# Supplementary material for: PLATO: A Predictive Drug Discovery Web Platform for Efficient Target Fishing and Bioactivity Profiling of Small Molecules
Source: MDPI journal article supplement (doi:10.3390/ijms23095245), 2022-05-08
Supplement: s1 [file s1]

# quantitative bioactivity profiling report

smiles: O=C(Nc1ccc(Cl)cc1)OC(COc2ccccc2)Cn3ccnc3

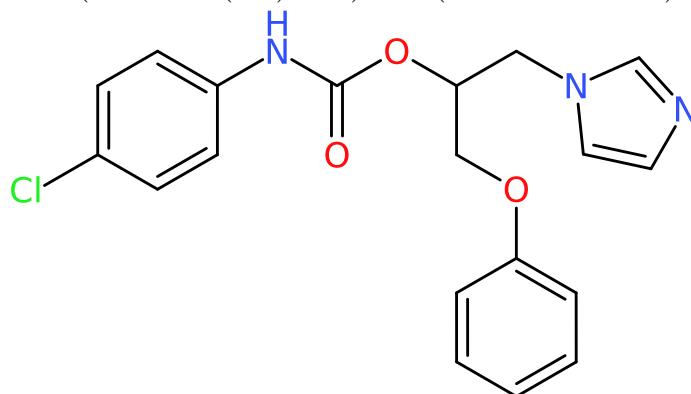



| Target                                                                                                                      | IC50   | EC50   | Ki     | Kd     | $\sigma_P$ |
|-----------------------------------------------------------------------------------------------------------------------------|--------|--------|--------|--------|------------|
| Neuronal acetylcholine receptor protein alpha-7 subunit:Rattus norvegicus                                                   | 306nM  | 420nM  | 192nM  | 4.90nM | 2.1: IC50  |
| Neurokinin 1 receptor:Homo sapiens                                                                                          | 13.1nM | 22.3nM | 8.78nM | 9.81nM | 2.1: IC50  |
| Orexin receptor 2:Homo sapiens                                                                                              | 101nM  | 145nM  | 112nM  | 100nM  | 2.1: Ki    |
| Orexin receptor 1:Homo sapiens                                                                                              | 160nM  | 3.95μM | 305nM  | 177nM  | 2.2: Ki    |
| Inosine-5'-monophosphate dehydrogenase:Bacillus anthracis                                                                   | 97.4nM |        | 32.0nM |        | 2.2: IC50  |
| Cytochrome P450 19A1:Homo sapiens                                                                                           | 598nM  |        | 79.7nM |        | 2.3: IC50  |
| 15-cis-phytoene desaturase:Synechococcus elongatus (strain PCC 7942) (Anacystis nidulans R2)                                | 211nM  |        |        |        | 2.3: IC50  |
| Protein farnesyltransferase:Homo sapiens                                                                                    | 118nM  | 7.69nM | 583nM  | 2.00nM | 2.3: IC50  |
| Thromboxane-A synthase:Homo sapiens                                                                                         | 129nM  |        |        | 452nM  | 2.4: IC50  |
| Metabotropic glutamate receptor 2:Homo sapiens                                                                              | 40.3nM | 223nM  | 85.9nM | 10.0nM | 2.4: EC50  |
| Inosine-5'-monophosphate dehydrogenase, probable:Cryptosporidium parvum                                                     | 90.3nM | 3.30μM | 10.9nM |        | 2.4: IC50  |
| Mitochondrial complex V; ATP synthase:Bos taurus                                                                            | 704nM  |        |        |        | 2.4: IC50  |
| Vascular endothelial growth factor receptor 2:Homo sapiens                                                                  | 151nM  | 65.2nM | 95.6nM | 123nM  | 2.4: IC50  |
| Geranylgeranyl transferase type I:Homo sapiens                                                                              | 883nM  | 389nM  | 8.00nM |        | 2.4: IC50  |
| Vascular endothelial growth factor receptor 1:Homo sapiens                                                                  | 255nM  | 454nM  | 59.8nM | 116nM  | 2.4: IC50  |
| Histamine H3 receptor:Rattus norvegicus                                                                                     | 15.3nM | 3.97nM | 14.9nM | 6.42nM | 2.4: Ki    |
| Neuronal acetylcholine receptor protein alpha-7 subunit:Homo sapiens                                                        | 2.30μM | 705nM  | 207nM  | 19.3nM | 2.4: Ki    |
| Histamine H1 receptor:Cavia porcellus                                                                                       | 176nM  | 111nM  | 334nM  | 242nM  | 2.4: Ki    |
| Histamine H2 receptor:Cavia porcellus                                                                                       | 2.15μM | 80.5nM | 3.77μM | 1.16μM | 2.4: Ki    |
| Acetylcholine-binding protein:Lymnaea stagnalis                                                                             |        |        | 663nM  | 670nM  | 2.4: Kd    |
| Human immunodeficiency virus type 1 Tat protein:Human immunodeficiency virus type 1 group M subtype B (isolate HXB2)(HIV-1) | 10.6μM | 2.24μM |        | 3.72μM | 2.5: EC50  |
| Coagulation factor X:Homo sapiens                                                                                           | 77.6nM |        | 70.9nM | 33.2nM | 2.5: Ki    |



| Target                                                                                   | IC50         | EC50  | Ki           | Kd           | $\sigma_P$ |
|------------------------------------------------------------------------------------------|--------------|-------|--------------|--------------|------------|
| Liver glycogen phosphorylase:Homo sapiens                                                | 296nM        |       | 3.35 $\mu$ M | 2.12 $\mu$ M | 2.5: IC50  |
| Coagulation factor IX:Homo sapiens                                                       | 203nM        |       | 34.9nM       |              | 2.5: Ki    |
| Urokinase-type plasminogen activator:Homo sapiens                                        | 1.62 $\mu$ M |       | 977nM        |              | 2.5: Ki    |
| Dopamine transporter:Rattus norvegicus                                                   | 116nM        | 771nM | 150nM        | 4.65nM       | 2.5: Ki    |
| Anandamide amidohydrolase:Rattus norvegicus                                              | 246nM        | 212nM | 36.0nM       | 0.60nM       | 2.5: IC50  |
| Heme oxygenase 1:Rattus norvegicus                                                       | 4.03 $\mu$ M |       |              |              | 2.5: IC50  |
| Human immunodeficiency virus type 1 reverse transcriptase:Human immunodeficiency virus 1 | 653nM        | 339nM | 212nM        | 10.5 $\mu$ M | 2.5: IC50  |
| Prostanoid EP1 receptor:Homo sapiens                                                     | 36.7nM       | 277nM | 291nM        | 60.4nM       | 2.5: IC50  |



tid: 12167

chembl id: [CHEMBL4980](#)

name: Neuronal acetylcholine receptor protein alpha-7 sub-unit:Rattus norvegicus

## similarity analysis

| structure                                                                           | chembl id                     | $\tau$         | IC50   | EC50  | Ki     | Kd     |
|-------------------------------------------------------------------------------------|-------------------------------|----------------|--------|-------|--------|--------|
| global result                                                                       |                               | 0.044:<br>IC50 | 306nM  | 420nM | 192nM  | 4.90nM |
| 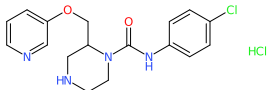   | <a href="#">CHEMBL3262153</a> | 0.024          | 70.0nM |       |        |        |
|    | <a href="#">CHEMBL3262155</a> | 0.024          | 9.50nM |       |        |        |
|    | <a href="#">CHEMBL3262164</a> | 0.018          | 18.0μM |       |        |        |
|   | <a href="#">CHEMBL3262150</a> | 0.018          | 110nM  |       |        |        |
|  | <a href="#">CHEMBL3262152</a> | 0.018          | 680nM  |       |        |        |
|  | <a href="#">CHEMBL371517</a>  | 0.012          |        |       | 5.00nM |        |
|  | <a href="#">CHEMBL193743</a>  | 0.012          |        |       | 10.0nM |        |
|  | <a href="#">CHEMBL194115</a>  | 0.012          |        |       | 7.00nM |        |
|  | <a href="#">CHEMBL193441</a>  | 0.012          |        |       | 6.00nM |        |



| structure                                                                           | chembl id                     | $\tau$ | IC50 | EC50  | Ki     | Kd     |
|-------------------------------------------------------------------------------------|-------------------------------|--------|------|-------|--------|--------|
| 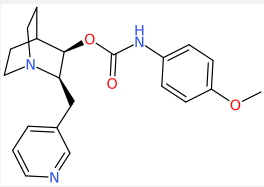   | <a href="#">CHEMBL194083</a>  | 0.012  |      | 300nM | 5.00nM |        |
|    | <a href="#">CHEMBL2179842</a> | 0.012  |      | 200nM |        |        |
|    | <a href="#">CHEMBL2179857</a> | 0.012  |      | 270nM |        |        |
|    | <a href="#">CHEMBL2179875</a> | 0.0092 |      | 130nM |        |        |
|   | <a href="#">CHEMBL2179841</a> | 0.0092 |      | 600nM |        |        |
|  | <a href="#">CHEMBL3746799</a> | 0.0067 |      |       |        | 120nM  |
|  | <a href="#">CHEMBL1917228</a> | 0.006  |      |       |        | 0.30nM |
|  | <a href="#">CHEMBL2113668</a> | 0.005  |      |       |        | 1.98nM |



tid: 250

chembl id: [CHEMBL249](#)

name: Neurokinin 1 receptor:Homo sapiens

## similarity analysis

| structure     | chembl id | $\tau$         | IC50   | EC50   | Ki     | Kd     |
|---------------|-----------|----------------|--------|--------|--------|--------|
| global result |           | 0.044:<br>IC50 | 13.1nM | 22.3nM | 8.78nM | 9.81nM |

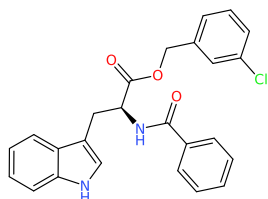

[CHEMBL279916](#) 0.024 1.05 $\mu$ M

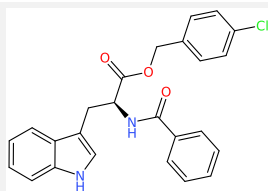

[CHEMBL279500](#) 0.024 243nM

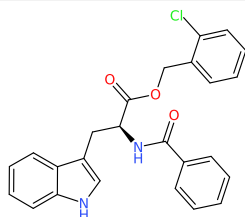

[CHEMBL23927](#) 0.018 600nM

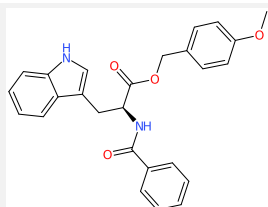

[CHEMBL282728](#) 0.018 5.50 $\mu$ M

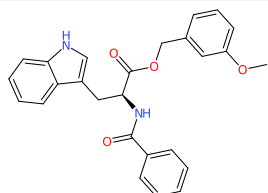

[CHEMBL23928](#) 0.018 760nM

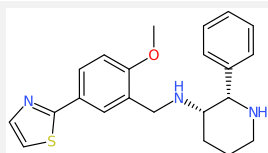

[CHEMBL147619](#) 0.0092 0.79nM

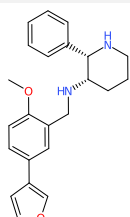

[CHEMBL356786](#) 0.0092 0.06nM



| structure                                                                           | chembl id    | $\tau$ | IC50 | EC50   | Ki     | Kd     |
|-------------------------------------------------------------------------------------|--------------|--------|------|--------|--------|--------|
| 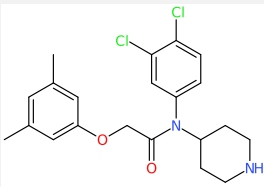   | CHEMBL91418  | 0.0092 |      |        | 25.1nM |        |
|    | CHEMBL359188 | 0.0092 |      |        | 0.06nM |        |
|    | CHEMBL359255 | 0.0092 |      |        | 0.16nM |        |
|    | CHEMBL441225 | 0.0077 |      |        |        | 1.26nM |
|   | CHEMBL22870  | 0.0077 |      |        |        | 3.98nM |
|  | CHEMBL58873  | 0.0077 |      |        |        | 1.30μM |
|  | CHEMBL16192  | 0.0077 |      |        |        | 2.74nM |
|  | CHEMBL71397  | 0.0077 |      |        |        | 0.32nM |
|  | CHEMBL24999  | 0.0067 |      | 24.4nM |        |        |
|  | CHEMBL303222 | 0.005  |      | 11.0nM |        |        |



| structure                                                                         | chembl id    | $\tau$ | IC50 | EC50   | Ki | Kd |
|-----------------------------------------------------------------------------------|--------------|--------|------|--------|----|----|
| 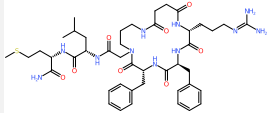 | CHEMBL421485 | 0.005  |      | 180nM  |    |    |
|  | CHEMBL302349 | 0.005  |      | 5.00nM |    |    |



tid: 12968

chembl id: [CHEMBL4792](#)

name: Orexin receptor 2:Homo sapiens

## similarity analysis

| structure                                                                           | chembl id                     | $\tau$    | IC50   | EC50  | Ki     | Kd    |
|-------------------------------------------------------------------------------------|-------------------------------|-----------|--------|-------|--------|-------|
| global result                                                                       |                               | 0.041: Ki | 101nM  | 145nM | 112nM  | 100nM |
| 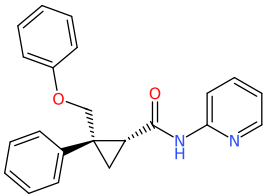   | <a href="#">CHEMBL3343247</a> | 0.024     |        |       | 967nM  |       |
|    | <a href="#">CHEMBL3341773</a> | 0.018     |        |       | 588nM  |       |
|   | <a href="#">CHEMBL3343249</a> | 0.018     |        |       | 1.33μM |       |
|  | <a href="#">CHEMBL3343252</a> | 0.018     |        |       | 51.0nM |       |
|  | <a href="#">CHEMBL3343246</a> | 0.018     |        |       | 36.0nM |       |
|  | <a href="#">CHEMBL3426151</a> | 0.012     | 21.0nM |       |        |       |
|  | <a href="#">CHEMBL3426141</a> | 0.012     | 11.0nM |       |        |       |
|  | <a href="#">CHEMBL3932552</a> | 0.0092    | 1.82μM |       |        |       |
|  | <a href="#">CHEMBL3667567</a> | 0.0092    | 37.0nM |       |        |       |



| structure                                                                           | chembl id     | $\tau$ | IC50  | EC50   | Ki | Kd     |
|-------------------------------------------------------------------------------------|---------------|--------|-------|--------|----|--------|
| 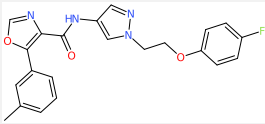   | CHEMBL3912238 | 0.0092 | 973nM |        |    |        |
|    | CHEMBL2413517 | 0.0092 |       |        |    | 2.00nM |
|    | CHEMBL3665672 | 0.0077 |       |        |    | 128nM  |
|    | CHEMBL3665674 | 0.0077 |       |        |    | 143nM  |
|   | CHEMBL3634019 | 0.0077 |       |        |    | 184nM  |
|  | CHEMBL3665733 | 0.0077 |       |        |    | 240nM  |
|  | CHEMBL3622426 | 0.0077 |       | 268nM  |    |        |
|  | CHEMBL3622419 | 0.0067 |       | 800nM  |    |        |
|  | CHEMBL3622421 | 0.0067 |       | 182nM  |    |        |
|  | CHEMBL3622422 | 0.0067 |       | 50.0nM |    |        |
|  | CHEMBL3622423 | 0.0067 |       | 235nM  |    |        |



tid: 10009  
chembl id: [CHEMBL5113](#)  
name: Orexin receptor 1:Homo sapiens

## similarity analysis

| structure                                                                           | chembl id                     | $\tau$    | IC50          | EC50         | Ki           | Kd    |
|-------------------------------------------------------------------------------------|-------------------------------|-----------|---------------|--------------|--------------|-------|
| global result                                                                       |                               | 0.041: Ki | 160nM         | 3.95 $\mu$ M | 305nM        | 177nM |
| 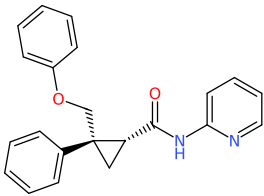   | <a href="#">CHEMBL3343247</a> | 0.024     |               |              | 6.84 $\mu$ M |       |
|    | <a href="#">CHEMBL3343252</a> | 0.018     |               |              | 206nM        |       |
|   | <a href="#">CHEMBL3343246</a> | 0.018     |               |              | 1.07 $\mu$ M |       |
|  | <a href="#">CHEMBL3341773</a> | 0.018     |               |              | 5.54 $\mu$ M |       |
|  | <a href="#">CHEMBL3585949</a> | 0.012     |               |              | 124nM        |       |
|  | <a href="#">CHEMBL2007173</a> | 0.012     | 4.70 $\mu$ M  |              |              |       |
|  | <a href="#">CHEMBL3426151</a> | 0.012     | 10.00 $\mu$ M |              |              |       |
|  | <a href="#">CHEMBL3426141</a> | 0.012     | 550nM         |              |              |       |



| structure                                                                           | chembl id     | $\tau$ | IC50         | EC50         | Ki | Kd     |
|-------------------------------------------------------------------------------------|---------------|--------|--------------|--------------|----|--------|
| 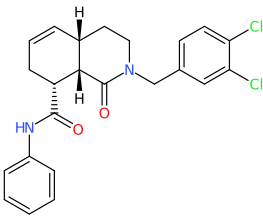   | CHEMBL1714761 | 0.012  | 1.44 $\mu$ M |              |    |        |
|    | CHEMBL1973904 | 0.012  | 5.34 $\mu$ M |              |    |        |
|    | CHEMBL3955752 | 0.0092 |              |              |    | 0.94nM |
|    | CHEMBL2413517 | 0.0092 |              |              |    | 696nM  |
|   | CHEMBL3665675 | 0.0077 |              |              |    | 116nM  |
|  | CHEMBL3665732 | 0.0077 |              |              |    | 589nM  |
|  | CHEMBL3665733 | 0.0077 |              |              |    | 501nM  |
|  | CHEMBL3622422 | 0.0067 |              | 5.23 $\mu$ M |    |        |
|  | CHEMBL3622428 | 0.0067 |              | 9.25 $\mu$ M |    |        |
|  | CHEMBL3623075 | 0.0067 |              | 1.62 $\mu$ M |    |        |
|  | CHEMBL3623076 | 0.0067 |              | 6.13 $\mu$ M |    |        |
|  | CHEMBL3623077 | 0.0067 |              | 5.72 $\mu$ M |    |        |



tid: 109471  
chembl id: [CHEMBL3329078](#)  
name: Inosine-5'-monophosphate dehydrogenase:Bacillus anthracis

## similarity analysis

| structure                                                                           | chembl id                     | $\tau$         | IC50   | EC50 | Ki     | Kd |
|-------------------------------------------------------------------------------------|-------------------------------|----------------|--------|------|--------|----|
| global result                                                                       |                               | 0.038:<br>IC50 | 97.4nM |      | 32.0nM |    |
|    | <a href="#">CHEMBL564117</a>  | 0.024          | 160nM  |      |        |    |
|   | <a href="#">CHEMBL557281</a>  | 0.018          | 120nM  |      |        |    |
|  | <a href="#">CHEMBL564187</a>  | 0.012          | 2.40μM |      |        |    |
|  | <a href="#">CHEMBL3329559</a> | 0.012          | 150nM  |      |        |    |
|  | <a href="#">CHEMBL3329560</a> | 0.012          | 760nM  |      |        |    |
|  | <a href="#">CHEMBL549612</a>  | 0.0092         |        |      | 46.9nM |    |
|  | <a href="#">CHEMBL1957258</a> | 0.0092         |        |      | 190nM  |    |



| structure                                                                         | chembl id                     | $\tau$ | IC50 | EC50 | Ki     | Kd |
|-----------------------------------------------------------------------------------|-------------------------------|--------|------|------|--------|----|
|  | <a href="#">CHEMBL2348823</a> | 0.0092 |      |      | 20.2nM |    |
|  | <a href="#">CHEMBL2315283</a> | 0.0077 |      |      | 77.5nM |    |
|  | <a href="#">CHEMBL2178617</a> | 0.0067 |      |      | 3.46nM |    |



tid: 65

chembl id: [CHEMBL1978](#)

name: Cytochrome P450 19A1:Homo sapiens

## similarity analysis

| structure                                                                           | chembl id                     | $\tau$         | IC50   | EC50 | Ki      | Kd |
|-------------------------------------------------------------------------------------|-------------------------------|----------------|--------|------|---------|----|
| global result                                                                       |                               | 0.036:<br>IC50 | 598nM  |      | 79.7nM  |    |
| 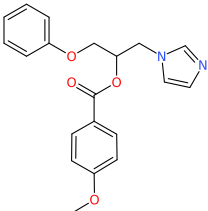   | <a href="#">CHEMBL1485809</a> | 0.024          | 16.5nM |      |         |    |
|    | <a href="#">CHEMBL1784798</a> | 0.012          | 248nM  |      |         |    |
|   | <a href="#">CHEMBL1784812</a> | 0.012          | 46.7nM |      |         |    |
|  | <a href="#">CHEMBL1825044</a> | 0.012          | 5.04μM |      |         |    |
|  | <a href="#">CHEMBL1096744</a> | 0.012          | 210nM  |      |         |    |
|  | <a href="#">CHEMBL1933693</a> | 0.018          |        |      | 100.0nM |    |
|  | <a href="#">CHEMBL2443356</a> | 0.0092         |        |      | 160nM   |    |
|  | <a href="#">CHEMBL1933701</a> | 0.0092         |        |      | 251nM   |    |



**structure****chembl id** **$\tau$** **IC50****EC50****Ki****Kd**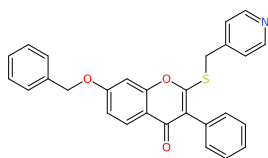[CHEMBL188664](#)

0.0092

220nM

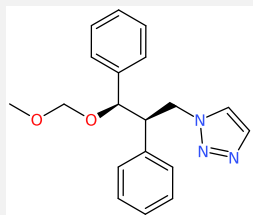[CHEMBL193369C](#)

0.0092

792nM



tid: 106616

chembl id: [CHEMBL2366472](#)

name: 15-cis-phytoene desaturase:Synechococcus elongatus  
(strain PCC 7942) (Anacystis nidulans R2)

## similarity analysis

| structure                                                                           | chembl id                     | $\tau$         | IC50   | EC50 | Ki | Kd |
|-------------------------------------------------------------------------------------|-------------------------------|----------------|--------|------|----|----|
| global result                                                                       |                               | 0.035:<br>IC50 | 211nM  |      |    |    |
| 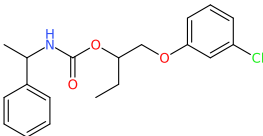   | <a href="#">CHEMBL2272706</a> | 0.018          | 63.1nM |      |    |    |
|    | <a href="#">CHEMBL2272992</a> | 0.018          | 126nM  |      |    |    |
|    | <a href="#">CHEMBL2272970</a> | 0.018          | 3.98μM |      |    |    |
|   | <a href="#">CHEMBL2272989</a> | 0.018          | 79.4nM |      |    |    |
|  | <a href="#">CHEMBL2272988</a> | 0.018          | 63.1nM |      |    |    |



tid: 104690  
chembl id: [CHEMBL2094108](#)  
name: Protein farnesyltransferase:Homo sapiens

## similarity analysis

| structure                                                                           | chembl id                    | $\tau$         | IC50   | EC50   | Ki    | Kd     |
|-------------------------------------------------------------------------------------|------------------------------|----------------|--------|--------|-------|--------|
| global result                                                                       |                              | 0.035:<br>IC50 | 118nM  | 7.69nM | 583nM | 2.00nM |
| 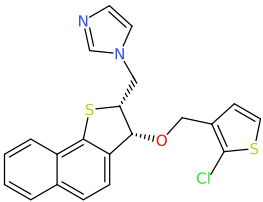   | <a href="#">CHEMBL133625</a> | 0.018          | 1.50μM |        |       |        |
|   | <a href="#">CHEMBL335517</a> | 0.018          | 4.56μM |        |       |        |
|  | <a href="#">CHEMBL336835</a> | 0.018          | 45.9μM |        |       |        |
|  | <a href="#">CHEMBL133288</a> | 0.018          | 1.40μM |        |       |        |
|  | <a href="#">CHEMBL299568</a> | 0.012          | 0.47nM |        |       |        |
|  | <a href="#">CHEMBL347172</a> | 0.0092         |        | 17.7nM |       |        |
|  | <a href="#">CHEMBL442552</a> | 0.0092         |        | 0.18nM |       |        |



| structure                                                                           | chembl id                    | $\tau$ | IC50 | EC50   | Ki     | Kd     |
|-------------------------------------------------------------------------------------|------------------------------|--------|------|--------|--------|--------|
| 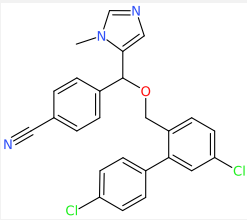   | <a href="#">CHEMBL158262</a> | 0.0092 |      | 525nM  |        |        |
|    | <a href="#">CHEMBL53821</a>  | 0.0092 |      | 79.0nM |        |        |
|    | <a href="#">CHEMBL310586</a> | 0.0092 |      | 0.62nM |        |        |
|   | <a href="#">CHEMBL300009</a> | 0.0077 |      |        | 40.0μM |        |
|  | <a href="#">CHEMBL301809</a> | 0.0077 |      |        | 420nM  |        |
|  | <a href="#">CHEMBL354262</a> | 0.0067 |      |        | 170nM  |        |
|  | <a href="#">CHEMBL297030</a> | 0.0067 |      |        | 25.5μM |        |
|  | <a href="#">CHEMBL50661</a>  | 0.0067 |      |        | 32.0μM |        |
|  | <a href="#">CHEMBL69330</a>  | 0.005  |      |        |        | 2.00nM |



tid: 248

chembl id: [CHEMBL1835](#)

name: Thromboxane-A synthase:Homo sapiens

## similarity analysis

| structure                                                                           | chembl id                    | $\tau$         | IC50   | EC50 | Ki | Kd    |
|-------------------------------------------------------------------------------------|------------------------------|----------------|--------|------|----|-------|
| global result                                                                       |                              | 0.034:<br>IC50 | 129nM  |      |    | 452nM |
| 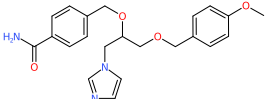   | <a href="#">CHEMBL290637</a> | 0.018          | 6.00μM |      |    |       |
|    | <a href="#">CHEMBL38825</a>  | 0.018          | 2.71μM |      |    |       |
|    | <a href="#">CHEMBL290933</a> | 0.018          | 6.20μM |      |    |       |
|   | <a href="#">CHEMBL41865</a>  | 0.012          | 7.20μM |      |    |       |
|  | <a href="#">CHEMBL160657</a> | 0.012          | 40.0nM |      |    |       |
|  | <a href="#">CHEMBL294850</a> | 0.0067         |        |      |    | 452nM |



tid: 12895

chembl id: [CHEMBL5137](#)

name: Metabotropic glutamate receptor 2:Homo sapiens

## similarity analysis

| structure                                                                           | chembl id                     | $\tau$         | IC50   | EC50   | Ki     | Kd     |
|-------------------------------------------------------------------------------------|-------------------------------|----------------|--------|--------|--------|--------|
| global result                                                                       |                               | 0.034:<br>EC50 | 40.3nM | 223nM  | 85.9nM | 10.0nM |
| 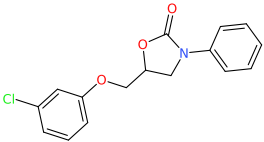   | <a href="#">CHEMBL1097984</a> | 0.018          |        | 840nM  |        |        |
|    | <a href="#">CHEMBL1095705</a> | 0.018          |        | 3.50μM |        |        |
|   | <a href="#">CHEMBL1094733</a> | 0.018          |        | 360nM  |        |        |
|  | <a href="#">CHEMBL1098388</a> | 0.012          |        | 3.44μM |        |        |
|  | <a href="#">CHEMBL4288731</a> | 0.012          |        | 330nM  |        |        |
|  | <a href="#">CHEMBL1630807</a> | 0.0092         | 1.00μM |        | 800nM  |        |
|  | <a href="#">CHEMBL1630805</a> | 0.0092         | 800nM  |        | 1.00μM |        |
|  | <a href="#">CHEMBL4107888</a> | 0.0092         | 13.5nM |        |        |        |
|  | <a href="#">CHEMBL3133887</a> | 0.0092         | 89.0nM |        |        |        |



| structure                                                                           | chembl id                     | $\tau$ | IC50  | EC50 | Ki     | Kd     |
|-------------------------------------------------------------------------------------|-------------------------------|--------|-------|------|--------|--------|
| 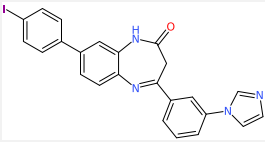   | <a href="#">CHEMBL3133884</a> | 0.0092 | 133nM |      |        |        |
|    | <a href="#">CHEMBL1630804</a> | 0.0077 |       |      | 6.60μM |        |
|    | <a href="#">CHEMBL1630806</a> | 0.0077 |       |      | 600nM  |        |
|    | <a href="#">CHEMBL4072134</a> | 0.0077 |       |      | 7.41nM | 15.6nM |
|    | <a href="#">CHEMBL4074664</a> | 0.0077 |       |      |        | 1.00nM |
|   | <a href="#">CHEMBL4077609</a> | 0.0067 |       |      |        | 3.00nM |
|  | <a href="#">CHEMBL4080973</a> | 0.0067 |       |      |        | 2.50nM |
|  | <a href="#">CHEMBL4081244</a> | 0.0067 |       |      |        | 16.6nM |



tid: 102448  
chembl id: [CHEMBL6145](#)  
name: Inosine-5'-monophosphate dehydrogenase, probable:Cryptosporidium parvum

## similarity analysis

| structure                                                                           | chembl id                     | $\tau$         | IC50   | EC50   | Ki     | Kd |
|-------------------------------------------------------------------------------------|-------------------------------|----------------|--------|--------|--------|----|
| global result                                                                       |                               | 0.034:<br>IC50 | 90.3nM | 3.30μM | 10.9nM |    |
|    | <a href="#">CHEMBL570997</a>  | 0.018          | 753nM  |        |        |    |
|   | <a href="#">CHEMBL557281</a>  | 0.018          | 744nM  |        |        |    |
|  | <a href="#">CHEMBL561635</a>  | 0.018          | 1.32μM |        |        |    |
|  | <a href="#">CHEMBL554061</a>  | 0.012          | 460nM  |        |        |    |
|  | <a href="#">CHEMBL549610</a>  | 0.012          | 16.4nM |        |        |    |
|  | <a href="#">CHEMBL549612</a>  | 0.0092         |        |        | 5.00nM |    |
|  | <a href="#">CHEMBL1957258</a> | 0.0092         |        |        | 13.5nM |    |



| structure                                                                         | chembl id                     | $\tau$ | IC50 | EC50   | Ki     | Kd |
|-----------------------------------------------------------------------------------|-------------------------------|--------|------|--------|--------|----|
| 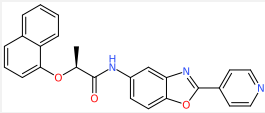 | <a href="#">CHEMBL2348823</a> | 0.0092 |      |        | 28.8nM |    |
|  | <a href="#">CHEMBL2315283</a> | 0.0077 |      |        | 15.7nM |    |
|  | <a href="#">CHEMBL2178617</a> | 0.0067 |      |        | 3.46nM |    |
|  | <a href="#">CHEMBL561640</a>  | 0.012  |      | 3.30μM |        |    |



tid: 100264

chembl id: [CHEMBL612444](#)

name: Mitochondrial complex V; ATP synthase:Bos taurus

## similarity analysis

| structure                                                                           | chembl id                    | $\tau$         | IC50   | EC50 | Ki | Kd |
|-------------------------------------------------------------------------------------|------------------------------|----------------|--------|------|----|----|
| global result                                                                       |                              | 0.034:<br>IC50 | 704nM  |      |    |    |
| 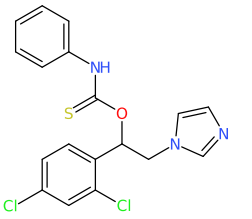   | <a href="#">CHEMBL8244</a>   | 0.018          | 3.60μM |      |    |    |
|   | <a href="#">CHEMBL416142</a> | 0.018          | 6.77μM |      |    |    |
|  | <a href="#">CHEMBL8376</a>   | 0.018          | 430nM  |      |    |    |
|  | <a href="#">CHEMBL8024</a>   | 0.012          | 82.0nM |      |    |    |
|  | <a href="#">CHEMBL7894</a>   | 0.012          | 2.27μM |      |    |    |



tid: 10980  
chembl id: [CHEMBL279](#)  
name: Vascular endothelial growth factor receptor 2:Homo sapiens

## similarity analysis

| structure                                                                           | chembl id                     | $\tau$         | IC50   | EC50   | Ki     | Kd    |
|-------------------------------------------------------------------------------------|-------------------------------|----------------|--------|--------|--------|-------|
| global result                                                                       |                               | 0.033:<br>IC50 | 151nM  | 65.2nM | 95.6nM | 123nM |
| 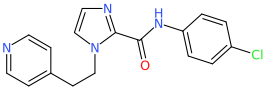   | <a href="#">CHEMBL234202</a>  | 0.018          | 708nM  |        |        |       |
|    | <a href="#">CHEMBL203003</a>  | 0.018          | 92.0nM |        |        |       |
|   | <a href="#">CHEMBL392330</a>  | 0.012          | 177nM  |        |        |       |
|  | <a href="#">CHEMBL382478</a>  | 0.012          | 690nM  |        |        |       |
|  | <a href="#">CHEMBL256556</a>  | 0.012          | 26.0nM |        |        |       |
|  | <a href="#">CHEMBL250228</a>  | 0.012          |        |        | 8.00nM |       |
|  | <a href="#">CHEMBL1980407</a> | 0.012          |        |        | 0.63nM |       |
|  | <a href="#">CHEMBL2000271</a> | 0.012          |        |        | 5.01μM |       |
|  | <a href="#">CHEMBL397323</a>  | 0.012          |        |        | 99.5nM |       |



| structure                                                                           | chembl id     | $\tau$ | IC50 | EC50   | Ki           | Kd           |
|-------------------------------------------------------------------------------------|---------------|--------|------|--------|--------------|--------------|
| 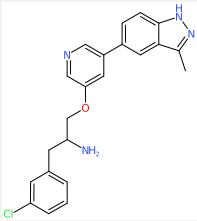   | CHEMBL197487C | 0.012  |      |        | 3.98 $\mu$ M |              |
|    | CHEMBL3703197 | 0.0077 |      |        |              | 2.90nM       |
|    | CHEMBL101253  | 0.0077 |      |        |              | 64.6nM       |
|    | CHEMBL608533  | 0.0077 |      |        |              | 3.20 $\mu$ M |
|   | CHEMBL3703195 | 0.0077 |      |        |              | 450nM        |
|  | CHEMBL3703194 | 0.0077 |      |        |              | 3.20nM       |
|  | CHEMBL4098219 | 0.0077 |      | 4.00nM |              |              |
|  | CHEMBL4090507 | 0.0077 |      | 14.0nM |              |              |
|  | CHEMBL4083641 | 0.0067 |      | 104nM  |              |              |



| structure                                                                         | chembl id                    | $\tau$ | IC50 | EC50   | Ki | Kd |
|-----------------------------------------------------------------------------------|------------------------------|--------|------|--------|----|----|
| 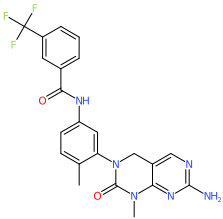 | <a href="#">CHEMBL459850</a> | 0.0067 |      | 22.0nM |    |    |
|  | <a href="#">CHEMBL475251</a> | 0.0067 |      | 36.0nM |    |    |



tid: 104749

chembl id: [CHEMBL2095164](#)

name: Geranylgeranyl transferase type I:Homo sapiens

## similarity analysis

| structure                                                                           | chembl id                    | $\tau$         | IC50         | EC50         | Ki     | Kd |
|-------------------------------------------------------------------------------------|------------------------------|----------------|--------------|--------------|--------|----|
| global result                                                                       |                              | 0.033:<br>IC50 | 883nM        | 389nM        | 8.00nM |    |
| 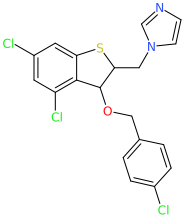   | <a href="#">CHEMBL133288</a> | 0.018          | 18.8 $\mu$ M |              |        |    |
|   | <a href="#">CHEMBL133625</a> | 0.018          | 15.0 $\mu$ M |              |        |    |
|  | <a href="#">CHEMBL53862</a>  | 0.012          | 350nM        |              |        |    |
|  | <a href="#">CHEMBL52859</a>  | 0.012          | 147nM        |              |        |    |
|  | <a href="#">CHEMBL52975</a>  | 0.012          | 675nM        |              |        |    |
|  | <a href="#">CHEMBL279433</a> | 0.0077         |              | 6.80 $\mu$ M |        |    |
|  | <a href="#">CHEMBL23460</a>  | 0.0067         |              | 3.40 $\mu$ M |        |    |



| structure                                                                         | chembl id    | $\tau$ | IC50 | EC50   | Ki     | Kd |
|-----------------------------------------------------------------------------------|--------------|--------|------|--------|--------|----|
| 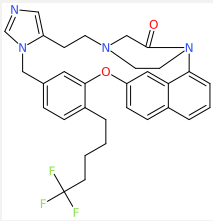 | CHEMBL23650  | 0.0067 |      | 800nM  |        |    |
|  | CHEMBL294888 | 0.0067 |      | 470nM  |        |    |
|  | CHEMBL63107  | 0.0067 |      | 71.0nM |        |    |
|  | CHEMBL53670  | 0.0067 |      |        | 8.00nM |    |



tid: 10979

chembl id: [CHEMBL1868](#)

name: Vascular endothelial growth factor receptor 1:Homo sapiens

## similarity analysis

| structure                                                                           | chembl id                     | $\tau$         | IC50   | EC50  | Ki     | Kd    |
|-------------------------------------------------------------------------------------|-------------------------------|----------------|--------|-------|--------|-------|
| global result                                                                       |                               | 0.033:<br>IC50 | 255nM  | 454nM | 59.8nM | 116nM |
| 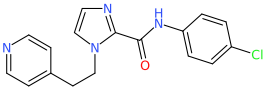   | <a href="#">CHEMBL234202</a>  | 0.018          | 940nM  |       |        |       |
|    | <a href="#">CHEMBL203003</a>  | 0.018          | 220nM  |       |        |       |
|   | <a href="#">CHEMBL203149</a>  | 0.012          | 6.85μM |       |        |       |
|  | <a href="#">CHEMBL425587</a>  | 0.012          | 180nM  |       |        |       |
|  | <a href="#">CHEMBL203167</a>  | 0.012          | 360nM  |       |        |       |
|  | <a href="#">CHEMBL1980407</a> | 0.012          |        |       | 0.63nM |       |
|  | <a href="#">CHEMBL1981133</a> | 0.0092         |        |       | 398nM  |       |



| structure                                                                           | chembl id     | $\tau$ | IC50 | EC50  | Ki           | Kd |
|-------------------------------------------------------------------------------------|---------------|--------|------|-------|--------------|----|
| 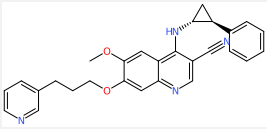   | CHEMBL248391  | 0.0092 |      |       | 1.90 $\mu$ M |    |
|    | CHEMBL1969502 | 0.0092 |      |       | 39.8nM       |    |
|    | CHEMBL1966524 | 0.0092 |      |       | 316nM        |    |
|    | CHEMBL608533  | 0.0077 |      |       | 450nM        |    |
|   | CHEMBL601719  | 0.0077 |      |       | 2.30 $\mu$ M |    |
|  | CHEMBL101253  | 0.0077 |      |       | 9.60nM       |    |
|  | CHEMBL572881  | 0.0077 |      |       | 12.0nM       |    |
|  | CHEMBL504075  | 0.0077 |      |       | 5.70nM       |    |
|  | CHEMBL459850  | 0.0067 |      | 236nM |              |    |



**structure**

**chembl id**

**$\tau$**

**IC50**

**EC50**

**Ki**

**Kd**

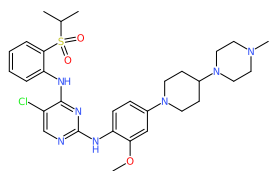

[CHEMBL509032](#)

0.0067

872nM



tid: 11300  
chembl id: [CHEMBL4124](#)  
name: Histamine H3 receptor:Rattus norvegicus

## similarity analysis

| structure                                                                           | chembl id                     | $\tau$    | IC50   | EC50   | Ki     | Kd     |
|-------------------------------------------------------------------------------------|-------------------------------|-----------|--------|--------|--------|--------|
| global result                                                                       |                               | 0.033: Ki | 15.3nM | 3.97nM | 14.9nM | 6.42nM |
| 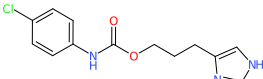   | <a href="#">CHEMBL16231</a>   | 0.018     |        |        | 4.09nM |        |
|    | <a href="#">CHEMBL16274</a>   | 0.018     |        |        | 120nM  |        |
|    | <a href="#">CHEMBL277989</a>  | 0.012     |        |        | 18.9nM |        |
|    | <a href="#">CHEMBL15842</a>   | 0.012     |        |        | 355nM  |        |
|   | <a href="#">CHEMBL16142</a>   | 0.012     |        |        | 13.3nM |        |
|  | <a href="#">CHEMBL393581</a>  | 0.0077    |        | 3.63nM |        |        |
|  | <a href="#">CHEMBL263101</a>  | 0.0077    |        | 7.24nM |        |        |
|  | <a href="#">CHEMBL1829335</a> | 0.0067    |        | 2.00nM |        |        |
|  | <a href="#">CHEMBL237394</a>  | 0.0067    |        | 0.74nM |        |        |
|  | <a href="#">CHEMBL392573</a>  | 0.0067    |        | 5.01nM |        |        |
|  | <a href="#">CHEMBL1223235</a> | 0.0077    | 9.20nM |        |        |        |
|  | <a href="#">CHEMBL493091</a>  | 0.0067    | 2.35μM |        |        |        |



| structure                                                                           | chembl id     | $\tau$ | IC50   | EC50 | Ki | Kd     |
|-------------------------------------------------------------------------------------|---------------|--------|--------|------|----|--------|
|    | CHEMBL1221428 | 0.0067 | 12.0nM |      |    |        |
|    | CHEMBL1223157 | 0.0067 | 17.0nM |      |    |        |
|    | CHEMBL1223236 | 0.0067 | 17.0nM |      |    |        |
|    | CHEMBL1171001 | 0.0067 |        |      |    | 11.5nM |
|    | CHEMBL481745  | 0.0067 |        |      |    | 10.0nM |
|   | CHEMBL1097881 | 0.006  |        |      |    | 12.6nM |
|  | CHEMBL1171002 | 0.006  |        |      |    | 5.01nM |
|  | CHEMBL1171936 | 0.006  |        |      |    | 6.92nM |



tid: 10635

chembl id: [CHEMBL2492](#)

name: Neuronal acetylcholine receptor protein alpha-7 sub-unit:Homo sapiens

## similarity analysis

| structure                                                                           | chembl id                     | $\tau$    | IC50         | EC50  | Ki           | Kd     |
|-------------------------------------------------------------------------------------|-------------------------------|-----------|--------------|-------|--------------|--------|
| global result                                                                       |                               | 0.033: Ki | 2.30 $\mu$ M | 705nM | 207nM        | 19.3nM |
| 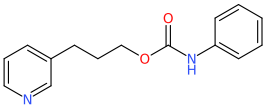   | <a href="#">CHEMBL1255822</a> | 0.018     |              |       | 14.5 $\mu$ M |        |
|    | <a href="#">CHEMBL1255823</a> | 0.018     |              |       | 6.92 $\mu$ M |        |
|   | <a href="#">CHEMBL3640294</a> | 0.012     |              |       | 7.00nM       |        |
|  | <a href="#">CHEMBL2179842</a> | 0.012     |              |       | 15.0nM       |        |
|  | <a href="#">CHEMBL1258240</a> | 0.012     |              |       | 2.69nM       |        |
|  | <a href="#">CHEMBL3303977</a> | 0.018     | 19.0nM       |       |              |        |
|  | <a href="#">CHEMBL3302229</a> | 0.018     | 11.0nM       |       |              |        |
|  | <a href="#">CHEMBL3302240</a> | 0.0092    | 6.00nM       |       |              |        |
|  | <a href="#">CHEMBL2381567</a> | 0.0077    | 59.1 $\mu$ M |       |              |        |
|  | <a href="#">CHEMBL2381566</a> | 0.0077    | 2.30 $\mu$ M |       |              |        |



| structure                                                                           | chembl id     | $\tau$ | IC50 | EC50   | Ki | Kd     |
|-------------------------------------------------------------------------------------|---------------|--------|------|--------|----|--------|
| 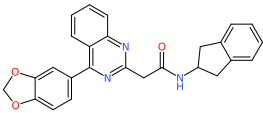   | CHEMBL1210643 | 0.0092 |      | 25.1nM |    |        |
|    | CHEMBL297784  | 0.0092 |      | 1.50μM |    |        |
|    | CHEMBL2440317 | 0.0092 |      | 560nM  |    |        |
|    | CHEMBL1258005 | 0.0092 |      | 50.0nM |    |        |
|   | CHEMBL1210579 | 0.0092 |      | 10.0nM |    |        |
|  | CHEMBL134713  | 0.0077 |      |        |    | 158nM  |
|  | CHEMBL1162395 | 0.0067 |      |        |    | 23.0nM |
|  | CHEMBL499536  | 0.006  |      |        |    | 200nM  |
|  | CHEMBL3       | 0.005  |      |        |    | 1.06nM |
|  | CHEMBL6623    | 0.005  |      |        |    | 2.59nM |



tid: 17074  
chembl id: [CHEMBL3943](#)  
name: Histamine H1 receptor:Cavia porcellus

## similarity analysis

| structure                                                                           | chembl id                     | $\tau$    | IC50   | EC50  | Ki      | Kd     |
|-------------------------------------------------------------------------------------|-------------------------------|-----------|--------|-------|---------|--------|
| global result                                                                       |                               | 0.033: Ki | 176nM  | 111nM | 334nM   | 242nM  |
| 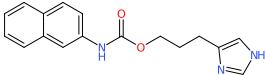   | <a href="#">CHEMBL16274</a>   | 0.018     |        |       | 7.94μM  |        |
|    | <a href="#">CHEMBL16231</a>   | 0.018     |        |       | 63.1μM  |        |
|    | <a href="#">CHEMBL277989</a>  | 0.012     |        |       | 25.1μM  |        |
|    | <a href="#">CHEMBL16142</a>   | 0.012     |        |       | 10.00μM |        |
|   | <a href="#">CHEMBL15883</a>   | 0.012     |        |       | 20.0μM  |        |
|  | <a href="#">CHEMBL128585</a>  | 0.0092    |        |       |         | 31.6μM |
|  | <a href="#">CHEMBL131476</a>  | 0.0092    |        |       |         | 7.94μM |
|  | <a href="#">CHEMBL499092</a>  | 0.0077    |        |       |         | 575nM  |
|  | <a href="#">CHEMBL470790</a>  | 0.0077    |        |       |         | 2.14μM |
|  | <a href="#">CHEMBL3401455</a> | 0.0077    |        |       |         | 155nM  |
|  | <a href="#">CHEMBL17808</a>   | 0.0092    | 430nM  |       |         |        |
|  | <a href="#">CHEMBL18255</a>   | 0.0077    | 15.0nM |       |         |        |



| structure                                                                           | chembl id                    | $\tau$ | IC50  | EC50   | Ki | Kd |
|-------------------------------------------------------------------------------------|------------------------------|--------|-------|--------|----|----|
| 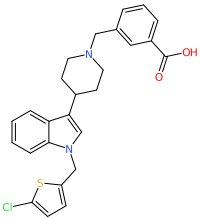   | <a href="#">CHEMBL185489</a> | 0.0077 | 184nM |        |    |    |
|    | <a href="#">CHEMBL373534</a> | 0.0077 | 130nM |        |    |    |
|    | <a href="#">CHEMBL100276</a> | 0.0077 | 561nM |        |    |    |
|    | <a href="#">CHEMBL424336</a> | 0.0067 |       | 115nM  |    |    |
|    | <a href="#">CHEMBL436415</a> | 0.0067 |       | 95.5nM |    |    |
|   | <a href="#">CHEMBL153468</a> | 0.0067 |       | 15.5nM |    |    |
|  | <a href="#">CHEMBL153067</a> | 0.0067 |       | 41.7nM |    |    |
|  | <a href="#">CHEMBL153321</a> | 0.0067 |       | 21.4nM |    |    |



tid: 10116  
chembl id: [CHEMBL2882](#)  
name: Histamine H2 receptor:Cavia porcellus

## similarity analysis

| structure                                                                           | chembl id                     | $\tau$    | IC50         | EC50   | Ki           | Kd           |
|-------------------------------------------------------------------------------------|-------------------------------|-----------|--------------|--------|--------------|--------------|
| global result                                                                       |                               | 0.033: Ki | 2.15 $\mu$ M | 80.5nM | 3.77 $\mu$ M | 1.16 $\mu$ M |
| 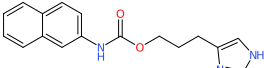   | <a href="#">CHEMBL16274</a>   | 0.018     |              |        | 7.94 $\mu$ M |              |
|    | <a href="#">CHEMBL16231</a>   | 0.018     |              |        | 79.4 $\mu$ M |              |
|    | <a href="#">CHEMBL16874</a>   | 0.012     |              |        | 5.01 $\mu$ M |              |
|    | <a href="#">CHEMBL15883</a>   | 0.012     |              |        | 12.6 $\mu$ M |              |
|   | <a href="#">CHEMBL274989</a>  | 0.012     |              |        | 63.1 $\mu$ M |              |
|  | <a href="#">CHEMBL3220665</a> | 0.0092    |              | 195nM  |              |              |
|  | <a href="#">CHEMBL470790</a>  | 0.0077    |              | 166nM  |              |              |
|  | <a href="#">CHEMBL472273</a>  | 0.0077    |              | 33.9nM |              |              |
|  | <a href="#">CHEMBL469749</a>  | 0.0077    |              | 54.9nM |              |              |
|  | <a href="#">CHEMBL472441</a>  | 0.0077    |              | 23.1nM |              |              |
|  | <a href="#">CHEMBL81520</a>   | 0.0077    |              |        |              | 631nM        |
|  | <a href="#">CHEMBL3220635</a> | 0.0077    |              |        |              | 479nM        |
|  | <a href="#">CHEMBL311272</a>  | 0.0077    |              |        |              | 631nM        |
|  | <a href="#">CHEMBL3220886</a> | 0.0077    |              |        |              | 19.1 $\mu$ M |
|  | <a href="#">CHEMBL311978</a>  | 0.0077    |              |        |              | 269nM        |



| structure                                                                           | chembl id                   | $\tau$ | IC50   | EC50 | Ki | Kd |
|-------------------------------------------------------------------------------------|-----------------------------|--------|--------|------|----|----|
| 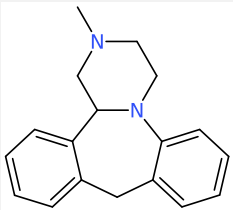   | <a href="#">CHEMBL6437</a>  | 0.006  | 880nM  |      |    |    |
|    | <a href="#">CHEMBL415</a>   | 0.006  | 720nM  |      |    |    |
|    | <a href="#">CHEMBL445</a>   | 0.006  | 7.00μM |      |    |    |
|   | <a href="#">CHEMBL72</a>    | 0.006  | 3.80μM |      |    |    |
|  | <a href="#">CHEMBL13645</a> | 0.006  | 19.0μM |      |    |    |



tid: 101435

chembl id: [CHEMBL6084](#)

name: Acetylcholine-binding protein:Lymnaea stagnalis

## similarity analysis

| structure                                                                           | chembl id                     | $\tau$    | IC50 | EC50 | Ki     | Kd      |
|-------------------------------------------------------------------------------------|-------------------------------|-----------|------|------|--------|---------|
| global result                                                                       |                               | 0.032: Kd |      |      | 663nM  | 670nM   |
| 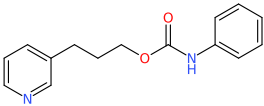   | <a href="#">CHEMBL1255822</a> | 0.018     |      |      | 282μM  | 741μM   |
|    | <a href="#">CHEMBL1255823</a> | 0.018     |      |      |        | 50.1μM  |
|   | <a href="#">CHEMBL1258126</a> | 0.012     |      |      | 61.7nM | 100.0nM |
|  | <a href="#">CHEMBL1258240</a> | 0.012     |      |      | 18.2nM | 24.0nM  |
|  | <a href="#">CHEMBL1258125</a> | 0.0092    |      |      | 148nM  | 240nM   |
|  | <a href="#">CHEMBL1258005</a> | 0.0092    |      |      | 89.1nM |         |



tid: 14042

chembl id: [CHEMBL4011](#)

name: Human immunodeficiency virus type 1 Tat protein:Human immunodeficiency virus type 1 group M subtype B (isolate HXB2)(HIV-1)

## similarity analysis

| structure                                                                           | chembl id                     | $\tau$         | IC50         | EC50         | Ki | Kd           |
|-------------------------------------------------------------------------------------|-------------------------------|----------------|--------------|--------------|----|--------------|
| global result                                                                       |                               | 0.031:<br>EC50 | 10.6 $\mu$ M | 2.24 $\mu$ M |    | 3.72 $\mu$ M |
| 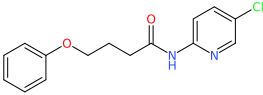   | <a href="#">CHEMBL1386792</a> | 0.024          |              | 6.70 $\mu$ M |    |              |
|    | <a href="#">CHEMBL483254</a>  | 0.0077         |              | 130nM        |    |              |
|  | <a href="#">CHEMBL98</a>      | 0.0067         |              | 2.30 $\mu$ M |    |              |
|  | <a href="#">CHEMBL2132936</a> | 0.0067         |              | 8.10 $\mu$ M |    |              |
|  | <a href="#">CHEMBL3310505</a> | 0.0067         |              | 220nM        |    |              |
|  | <a href="#">CHEMBL1081563</a> | 0.006          | 19.0 $\mu$ M |              |    |              |
|  | <a href="#">CHEMBL1075829</a> | 0.005          | 30.0 $\mu$ M |              |    |              |
|  | <a href="#">CHEMBL1075830</a> | 0.005          | 7.00 $\mu$ M |              |    |              |
|  | <a href="#">CHEMBL1075815</a> | 0.005          | 6.00 $\mu$ M |              |    |              |
|  | <a href="#">CHEMBL1075821</a> | 0.005          | 12.0 $\mu$ M |              |    |              |



| structure                                                                         | chembl id                    | $\tau$ | IC50 | EC50 | Ki | Kd           |
|-----------------------------------------------------------------------------------|------------------------------|--------|------|------|----|--------------|
| 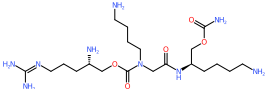 | <a href="#">CHEMBL196072</a> | 0.005  |      |      |    | 1.80 $\mu$ M |
|  | <a href="#">CHEMBL371627</a> | 0.005  |      |      |    | 7.70 $\mu$ M |



tid: 194

chembl id: [CHEMBL244](#)

name: Coagulation factor X:Homo sapiens

## similarity analysis

| structure                                                                           | chembl id                     | $\tau$   | IC50   | EC50 | Ki     | Kd     |
|-------------------------------------------------------------------------------------|-------------------------------|----------|--------|------|--------|--------|
| global result                                                                       |                               | 0.03: Ki | 77.6nM |      | 70.9nM | 33.2nM |
| 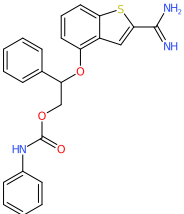   | <a href="#">CHEMBL598400</a>  | 0.018    |        |      | 1.81μM |        |
|    | <a href="#">CHEMBL94563</a>   | 0.012    |        |      | 1.80μM |        |
|   | <a href="#">CHEMBL597370</a>  | 0.012    |        |      | 560nM  |        |
|  | <a href="#">CHEMBL599001</a>  | 0.012    |        |      | 250nM  |        |
|  | <a href="#">CHEMBL602083</a>  | 0.012    |        |      | 1.59μM |        |
|  | <a href="#">CHEMBL3671231</a> | 0.012    | 2.00μM |      |        |        |
|  | <a href="#">CHEMBL476187</a>  | 0.012    | 4.60nM |      |        |        |
|  | <a href="#">CHEMBL3671221</a> | 0.012    | 1.70μM |      |        |        |



| structure                                                                           | chembl id                     | $\tau$ | IC50   | EC50 | Ki | Kd     |
|-------------------------------------------------------------------------------------|-------------------------------|--------|--------|------|----|--------|
| 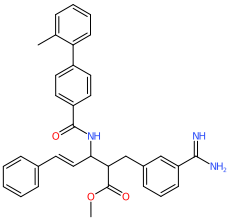   | <a href="#">CHEMBL138299</a>  | 0.0092 | 90.0nM |      |    |        |
|    | <a href="#">CHEMBL3415983</a> | 0.0092 | 179nM  |      |    |        |
|    | <a href="#">CHEMBL198654</a>  | 0.0092 |        |      |    | 14.7nM |
|    | <a href="#">CHEMBL436293</a>  | 0.0092 |        |      |    | 99.2nM |
|    | <a href="#">CHEMBL46618</a>   | 0.0092 |        |      |    | 38.8nM |
|   | <a href="#">CHEMBL1221916</a> | 0.0092 |        |      |    | 4.30nM |
|  | <a href="#">CHEMBL196492</a>  | 0.0092 |        |      |    | 17.7nM |



tid: 11442

chembl id: [CHEMBL2568](#)

name: Liver glycogen phosphorylase:Homo sapiens

## similarity analysis

| structure                                                                           | chembl id                     | $\tau$        | IC50   | EC50 | Ki           | Kd           |
|-------------------------------------------------------------------------------------|-------------------------------|---------------|--------|------|--------------|--------------|
| global result                                                                       |                               | 0.03:<br>IC50 | 296nM  |      | 3.35 $\mu$ M | 2.12 $\mu$ M |
| 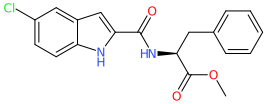   | <a href="#">CHEMBL100872</a>  | 0.018         | 140nM  |      |              |              |
|    | <a href="#">CHEMBL319854</a>  | 0.012         | 210nM  |      |              |              |
|    | <a href="#">CHEMBL134854</a>  | 0.012         | 47.0nM |      |              |              |
|   | <a href="#">CHEMBL136712</a>  | 0.012         | 240nM  |      |              |              |
|  | <a href="#">CHEMBL136812</a>  | 0.012         | 110nM  |      |              |              |
|  | <a href="#">CHEMBL243412</a>  | 0.0092        |        |      | 80.0 $\mu$ M |              |
|  | <a href="#">CHEMBL242918</a>  | 0.0077        |        |      | 12.0 $\mu$ M |              |
|  | <a href="#">CHEMBL245060</a>  | 0.0077        |        |      | 30.0 $\mu$ M |              |
|  | <a href="#">CHEMBL3770455</a> | 0.006         |        |      | 26.0nM       |              |
|  | <a href="#">CHEMBL417267C</a> | 0.006         |        |      | 2.67 $\mu$ M |              |



| structure                                                                         | chembl id    | $\tau$ | IC50 | EC50 | Ki | Kd           |
|-----------------------------------------------------------------------------------|--------------|--------|------|------|----|--------------|
| 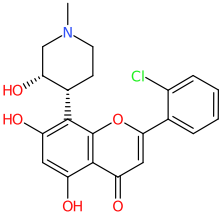 | CHEMBL428690 | 0.006  |      |      |    | 2.12 $\mu$ M |



tid: 193

chembl id: [CHEMBL2016](#)

name: Coagulation factor IX:Homo sapiens

## similarity analysis

| structure                                                                           | chembl id                     | $\tau$   | IC50   | EC50 | Ki      | Kd |
|-------------------------------------------------------------------------------------|-------------------------------|----------|--------|------|---------|----|
| global result                                                                       |                               | 0.03: Ki | 203nM  |      | 34.9nM  |    |
|    | <a href="#">CHEMBL598400</a>  | 0.018    |        |      | 10.0nM  |    |
|    | <a href="#">CHEMBL605842</a>  | 0.012    |        |      | 61.0nM  |    |
|  | <a href="#">CHEMBL599001</a>  | 0.012    |        |      | 100.0nM |    |
|  | <a href="#">CHEMBL602083</a>  | 0.012    |        |      | 15.5nM  |    |
|  | <a href="#">CHEMBL597370</a>  | 0.012    |        |      | 50.0nM  |    |
|  | <a href="#">CHEMBL3658386</a> | 0.0092   | 20.0nM |      |         |    |
|  | <a href="#">CHEMBL3658394</a> | 0.0092   | 66.0nM |      |         |    |
|  | <a href="#">CHEMBL3658388</a> | 0.0092   | 40.0nM |      |         |    |
|  | <a href="#">CHEMBL3924571</a> | 0.0077   | 445nM  |      |         |    |



| structure                                                                         | chembl id     | $\tau$ | IC50         | EC50 | Ki | Kd |
|-----------------------------------------------------------------------------------|---------------|--------|--------------|------|----|----|
| 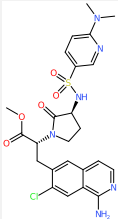 | CHEMBL3929161 | 0.0077 | 5.60 $\mu$ M |      |    |    |



tid: 11942

chembl id: [CHEMBL3286](#)

name: Urokinase-type plasminogen activator:Homo sapiens

## similarity analysis

| structure                                                                           | chembl id                    | $\tau$   | IC50         | EC50 | Ki           | Kd |
|-------------------------------------------------------------------------------------|------------------------------|----------|--------------|------|--------------|----|
| global result                                                                       |                              | 0.03: Ki | 1.62 $\mu$ M |      | 977nM        |    |
|    | <a href="#">CHEMBL598400</a> | 0.018    |              |      | 440nM        |    |
|    | <a href="#">CHEMBL604294</a> | 0.012    |              |      | 1.63 $\mu$ M |    |
|  | <a href="#">CHEMBL598989</a> | 0.012    |              |      | 308nM        |    |
|  | <a href="#">CHEMBL599394</a> | 0.012    |              |      | 297nM        |    |
|  | <a href="#">CHEMBL599001</a> | 0.012    |              |      | 310nM        |    |
|  | <a href="#">CHEMBL393592</a> | 0.012    | 114nM        |      |              |    |
|  | <a href="#">CHEMBL239747</a> | 0.012    | 7.20nM       |      |              |    |



| structure                                                                         | chembl id                     | $\tau$ | IC50   | EC50 | Ki | Kd |
|-----------------------------------------------------------------------------------|-------------------------------|--------|--------|------|----|----|
| 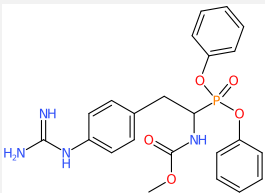 | <a href="#">CHEMBL393591</a>  | 0.012  | 3.10nM |      |    |    |
|  | <a href="#">CHEMBL3771195</a> | 0.012  | 19.8μM |      |    |    |
|  | <a href="#">CHEMBL239331</a>  | 0.012  | 840nM  |      |    |    |



tid: 13077

chembl id: [CHEMBL338](#)

name: Dopamine transporter:Rattus norvegicus

## similarity analysis

| structure                                                                           | chembl id                     | $\tau$   | IC50   | EC50  | Ki     | Kd     |
|-------------------------------------------------------------------------------------|-------------------------------|----------|--------|-------|--------|--------|
| global result                                                                       |                               | 0.03: Ki | 116nM  | 771nM | 150nM  | 4.65nM |
| 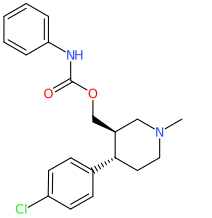   | <a href="#">CHEMBL103805</a>  | 0.018    |        |       | 91.0nM |        |
|   | <a href="#">CHEMBL93721</a>   | 0.012    | 1.98nM |       | 5.25nM |        |
|  | <a href="#">CHEMBL211248C</a> | 0.012    |        |       | 3.28μM |        |
|  | <a href="#">CHEMBL59545</a>   | 0.012    |        |       | 4.44μM |        |
|  | <a href="#">CHEMBL211248I</a> | 0.012    |        |       | 1.08μM |        |
|  | <a href="#">CHEMBL420343</a>  | 0.012    | 55.0nM |       |        |        |
|  | <a href="#">CHEMBL1254674</a> | 0.012    | 76.1nM |       |        |        |
|  | <a href="#">CHEMBL328204</a>  | 0.012    | 19.0nM |       |        |        |



| structure                                                                           | chembl id                     | $\tau$ | IC50   | EC50         | Ki     | Kd |
|-------------------------------------------------------------------------------------|-------------------------------|--------|--------|--------------|--------|----|
|    | <a href="#">CHEMBL125384C</a> | 0.012  | 31.0nM |              |        |    |
|    | <a href="#">CHEMBL127804C</a> | 0.0077 |        | 2.59 $\mu$ M |        |    |
|    | <a href="#">CHEMBL127760C</a> | 0.0067 |        | 11.2 $\mu$ M |        |    |
|   | <a href="#">CHEMBL127761C</a> | 0.0067 |        | 6.92 $\mu$ M |        |    |
|  | <a href="#">CHEMBL127779C</a> | 0.006  |        | 2.40 $\mu$ M |        |    |
|  | <a href="#">CHEMBL127751C</a> | 0.006  |        | 2.71 $\mu$ M |        |    |
|  | <a href="#">CHEMBL538876</a>  | 0.0077 |        |              | 4.00nM |    |
|  | <a href="#">CHEMBL194708C</a> | 0.0077 |        |              | 9.00nM |    |
|  | <a href="#">CHEMBL23714</a>   | 0.0067 |        |              | 1.00nM |    |



| structure                                                                         | chembl id    | $\tau$ | IC50 | EC50 | Ki | Kd     |
|-----------------------------------------------------------------------------------|--------------|--------|------|------|----|--------|
|  | CHEMBL781    | 0.005  |      |      |    | 8.63nM |
|  | CHEMBL138438 | 0.005  |      |      |    | 8.91nM |



tid: 11289

chembl id: [CHEMBL3229](#)

name: Anandamide amidohydrolase:Rattus norvegicus

## similarity analysis

| structure                                                                           | chembl id                     | $\tau$        | IC50   | EC50  | Ki     | Kd     |
|-------------------------------------------------------------------------------------|-------------------------------|---------------|--------|-------|--------|--------|
| global result                                                                       |                               | 0.03:<br>IC50 | 246nM  | 212nM | 36.0nM | 0.60nM |
| 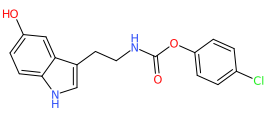   | <a href="#">CHEMBL241137</a>  | 0.018         | 6.80μM |       |        |        |
|    | <a href="#">CHEMBL3677685</a> | 0.012         | 135nM  |       |        |        |
|   | <a href="#">CHEMBL485886</a>  | 0.012         | 214nM  |       |        |        |
|  | <a href="#">CHEMBL520360</a>  | 0.012         | 479nM  |       |        |        |
|  | <a href="#">CHEMBL485689</a>  | 0.012         | 138nM  |       |        |        |
|  | <a href="#">CHEMBL3264469</a> | 0.0092        |        |       | 16.0nM |        |
|  | <a href="#">CHEMBL387680</a>  | 0.0092        |        |       | 5.30μM |        |
|  | <a href="#">CHEMBL3318621</a> | 0.0092        |        |       | 710nM  |        |
|  | <a href="#">CHEMBL3264466</a> | 0.0092        |        |       | 23.0nM |        |
|  | <a href="#">CHEMBL3264464</a> | 0.0092        |        |       | 20.0nM |        |
|  | <a href="#">CHEMBL1761301</a> | 0.0092        |        | 280nM |        |        |



| structure                                                                           | chembl id     | $\tau$ | IC50 | EC50         | Ki | Kd     |
|-------------------------------------------------------------------------------------|---------------|--------|------|--------------|----|--------|
| 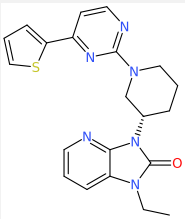   | CHEMBL1761300 | 0.0077 |      | 1.80 $\mu$ M |    |        |
|    | CHEMBL1761302 | 0.0077 |      | 100.0nM      |    |        |
|    | CHEMBL1761303 | 0.0077 |      | 80.0nM       |    |        |
|   | CHEMBL1761304 | 0.0077 |      | 100.0nM      |    |        |
|  | CHEMBL2386571 | 0.0067 |      |              |    | 0.60nM |



tid: 20059

chembl id: [CHEMBL5035](#)

name: Heme oxygenase 1:Rattus norvegicus

## similarity analysis

| structure                                                                           | chembl id                    | $\tau$        | IC50          | EC50 | Ki | Kd |
|-------------------------------------------------------------------------------------|------------------------------|---------------|---------------|------|----|----|
| global result                                                                       |                              | 0.03:<br>IC50 | 4.03 $\mu$ M  |      |    |    |
| 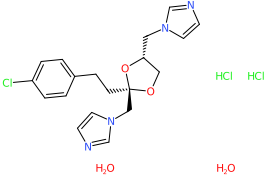   | <a href="#">CHEMBL459907</a> | 0.018         | 10.00 $\mu$ M |      |    |    |
|    | <a href="#">CHEMBL474961</a> | 0.012         | 9.00 $\mu$ M  |      |    |    |
|   | <a href="#">CHEMBL472975</a> | 0.012         | 900nM         |      |    |    |
|  | <a href="#">CHEMBL472782</a> | 0.012         | 5.00 $\mu$ M  |      |    |    |
|  | <a href="#">CHEMBL475163</a> | 0.012         | 1.03 $\mu$ M  |      |    |    |



tid: 228

chembl id: [CHEMBL247](#)

name: Human immunodeficiency virus type 1 reverse transcriptase:Human immunodeficiency virus 1

## similarity analysis

| structure                                                                           | chembl id                     | $\tau$        | IC50         | EC50  | Ki           | Kd           |
|-------------------------------------------------------------------------------------|-------------------------------|---------------|--------------|-------|--------------|--------------|
| global result                                                                       |                               | 0.03:<br>IC50 | 653nM        | 339nM | 212nM        | 10.5 $\mu$ M |
| 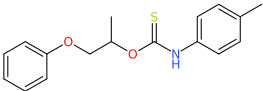   | <a href="#">CHEMBL471691</a>  | 0.018         | 1.40 $\mu$ M |       |              |              |
|    | <a href="#">CHEMBL3797342</a> | 0.012         | 9.07 $\mu$ M |       |              |              |
|   | <a href="#">CHEMBL3800107</a> | 0.012         | 9.70 $\mu$ M |       |              |              |
|  | <a href="#">CHEMBL3397636</a> | 0.012         | 26.9 $\mu$ M |       |              |              |
|  | <a href="#">CHEMBL1923490</a> | 0.012         | 3.00nM       |       |              |              |
|  | <a href="#">CHEMBL2337189</a> | 0.012         |              |       | 1.00 $\mu$ M |              |
|  | <a href="#">CHEMBL1835505</a> | 0.012         |              |       | 210nM        |              |
|  | <a href="#">CHEMBL1835510</a> | 0.012         |              |       | 2.83 $\mu$ M |              |
|  | <a href="#">CHEMBL1835502</a> | 0.012         |              |       | 2.60 $\mu$ M |              |



| structure                                                                           | chembl id     | $\tau$ | IC50 | EC50         | Ki           | Kd |
|-------------------------------------------------------------------------------------|---------------|--------|------|--------------|--------------|----|
| 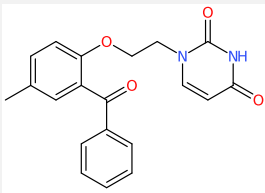   | CHEMBL1835501 | 0.012  |      |              | 1.70 $\mu$ M |    |
|    | CHEMBL3983638 | 0.012  |      | 3.22 $\mu$ M |              |    |
|    | CHEMBL350574  | 0.012  |      | 1.30 $\mu$ M |              |    |
|    | CHEMBL165232  | 0.012  |      | 8.80 $\mu$ M |              |    |
|    | CHEMBL164496  | 0.012  |      | 4.00 $\mu$ M |              |    |
|   | CHEMBL165121  | 0.012  |      | 7.70 $\mu$ M |              |    |
|  | CHEMBL1671953 | 0.012  |      |              | 800 $\mu$ M  |    |
|  | CHEMBL1468531 | 0.012  |      |              | 1.70mM       |    |
|  | CHEMBL316796  | 0.0077 |      |              | 6.00 $\mu$ M |    |
|  | CHEMBL317356  | 0.0077 |      |              | 2.00 $\mu$ M |    |
|  | CHEMBL1535399 | 0.0077 |      |              | 30.0 $\mu$ M |    |



tid: 261

chembl id: [CHEMBL1811](#)

name: Prostanoid EP1 receptor:Homo sapiens

## similarity analysis

| structure                                                                           | chembl id                    | $\tau$        | IC50   | EC50  | Ki     | Kd     |
|-------------------------------------------------------------------------------------|------------------------------|---------------|--------|-------|--------|--------|
| global result                                                                       |                              | 0.03:<br>IC50 | 36.7nM | 277nM | 291nM  | 60.4nM |
| 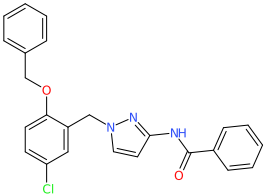   | <a href="#">CHEMBL255485</a> | 0.018         | 251nM  |       |        |        |
|    | <a href="#">CHEMBL257147</a> | 0.012         | 126nM  |       |        |        |
|   | <a href="#">CHEMBL404698</a> | 0.012         | 39.8nM |       |        |        |
|  | <a href="#">CHEMBL520438</a> | 0.012         | 6.31nM |       | 39.8nM |        |
|  | <a href="#">CHEMBL402326</a> | 0.012         | 398nM  |       |        |        |
|  | <a href="#">CHEMBL207293</a> | 0.012         |        |       | 3.55nM |        |
|  | <a href="#">CHEMBL256092</a> | 0.012         |        |       | 50.1nM | 7.94nM |
|  | <a href="#">CHEMBL125588</a> | 0.0092        |        |       | 48.0μM |        |
|  | <a href="#">CHEMBL124675</a> | 0.0092        |        |       | 85.0μM |        |



| structure                                                                           | chembl id                     | $\tau$ | IC50 | EC50         | Ki | Kd           |
|-------------------------------------------------------------------------------------|-------------------------------|--------|------|--------------|----|--------------|
| 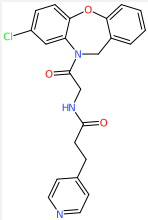   | <a href="#">CHEMBL347397</a>  | 0.0092 |      |              |    | 2.00 $\mu$ M |
|    | <a href="#">CHEMBL258199</a>  | 0.0092 |      |              |    | 50.1nM       |
|    | <a href="#">CHEMBL358653</a>  | 0.0077 |      |              |    | 7.94nM       |
|    | <a href="#">CHEMBL155358</a>  | 0.0077 |      |              |    | 316nM        |
|   | <a href="#">CHEMBL37853</a>   | 0.0067 |      | 760nM        |    |              |
|  | <a href="#">CHEMBL3947001</a> | 0.0067 |      | 6.95 $\mu$ M |    |              |
|  | <a href="#">CHEMBL3804978</a> | 0.0067 |      | 1.40nM       |    |              |
|  | <a href="#">CHEMBL3805176</a> | 0.0067 |      | 160nM        |    |              |
|  | <a href="#">CHEMBL3805169</a> | 0.0067 |      | 970nM        |    |              |
