# Supplementary material for: PLATO: A Predictive Drug Discovery Web Platform for Efficient Target Fishing and Bioactivity Profiling of Small Molecules
Source: MDPI journal article supplement (doi:10.3390/ijms23095245), 2022-05-08
Supplement: s1 [file s1]

# target fishing

smiles: O=C(Nc1ccc(Cl)cc1)OC(COc2ccccc2)Cn3ccnc3

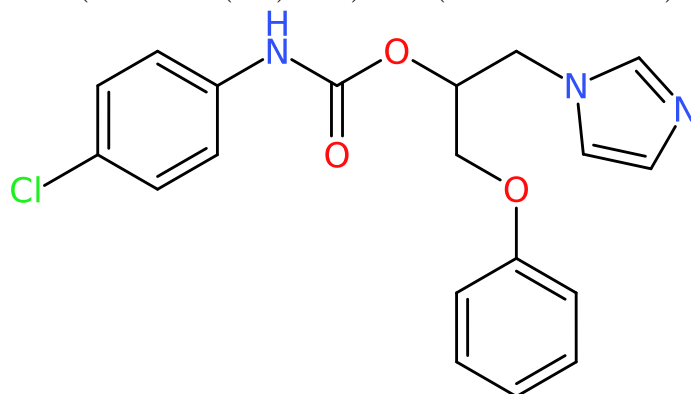

| Target                                                                                       | score | reliable |
|----------------------------------------------------------------------------------------------|-------|----------|
| Cytochrome P450 19A1:Homo sapiens                                                            | 4.22  | no       |
| Mitochondrial complex V; ATP synthase:Bos taurus                                             | 3.19  | no       |
| Thromboxane-A synthase:Homo sapiens                                                          | 2.96  | no       |
| Cytochrome P450 1A2:Homo sapiens                                                             | 2.60  | no       |
| Cytochrome P450 2C19:Homo sapiens                                                            | 2.60  | no       |
| Cytochrome P450 2C9:Homo sapiens                                                             | 2.60  | no       |
| Beta-1 adrenergic receptor:Homo sapiens                                                      | 2.30  | no       |
| Cytochrome P450 2D6:Homo sapiens                                                             | 2.30  | no       |
| Heme oxygenase 1:Rattus norvegicus                                                           | 2.26  | no       |
| Vascular endothelial growth factor receptor 2:Homo sapiens                                   | 1.83  | no       |
| Beta-2 adrenergic receptor:Canis lupus familiaris                                            | 1.75  | no       |
| 15-cis-phytoene desaturase:Synechococcus elongatus (strain PCC 7942) (Anacystis nidulans R2) | 1.70  | no       |
| Prostanoid EP1 receptor:Homo sapiens                                                         | 1.47  | no       |
| Cytochrome P450 3A4:Homo sapiens                                                             | 1.42  | no       |
| Beta-3 adrenergic receptor:Homo sapiens                                                      | 1.38  | no       |
| Neuronal acetylcholine receptor protein alpha-7 sub-unit:Rattus norvegicus                   | 1.21  | no       |
| Metabotropic glutamate receptor 5:Homo sapiens                                               | 1.20  | no       |
| Histamine H2 receptor:Cavia porcellus                                                        | 1.10  | no       |
| Histamine H3 receptor:Rattus norvegicus                                                      | 1.10  | no       |
| Histamine H1 receptor:Cavia porcellus                                                        | 1.10  | no       |
| Sterol 14-alpha demethylase:Trypanosoma cruzi (strain CL Brener)                             | 1.06  | no       |
| Vascular endothelial growth factor receptor 1:Homo sapiens                                   | 1.00  | no       |
| Anandamide amidohydrolase:Rattus norvegicus                                                  | 0.93  | no       |
| 1-acylglycerol-3-phosphate O-acyltransferase beta:Homo sapiens                               | 0.87  | no       |
| M18 aspartyl aminopeptidase:Plasmodium falciparum 3D7                                        | 0.87  | no       |
| Galanin receptor 3:Homo sapiens                                                              | 0.87  | no       |
| Lysophosphatidic acid receptor Edg-2:Homo sapiens                                            | 0.87  | no       |
| P2X purinoceptor 7:Homo sapiens                                                              | 0.86  | no       |
| P2X purinoceptor 7:Rattus norvegicus                                                         | 0.86  | no       |
| Lysine-specific histone demethylase 1:Homo sapiens                                           | 0.86  | no       |

tid: 65  
chembl id: [CHEMBL1978](#)  
name: Cytochrome P450 19A1:Homo sapiens

## similarity analysis

| structure                                                                                                                           | mfp1 | featmfp1 | rdkit7 | pattern | ap_bits | tt_bits | fp2  | pubchem | cdk_maccs | graph | substructure | hybridization | klekota_roth |
|-------------------------------------------------------------------------------------------------------------------------------------|------|----------|--------|---------|---------|---------|------|---------|-----------|-------|--------------|---------------|--------------|
| 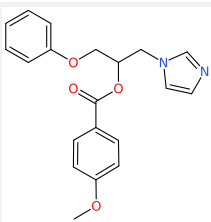<br><a href="#">CHEMBL1485809</a><br>IC50:16.5nM   | 0.66 |          | 0.55   |         | 0.53    | 0.61    | 0.54 |         |           | 0.64  |              | 0.62          | 0.52         |
| <br><a href="#">CHEMBL1784798</a><br>IC50:248nM   | 0.72 |          |        |         |         |         |      | 0.84    | 0.73      |       |              |               |              |
| <br><a href="#">CHEMBL1784796</a><br>IC50:3.50μM |      |          |        | 0.87    |         |         |      |         |           |       |              |               |              |
| <br><a href="#">CHEMBL1824763</a><br>IC50:13.4μM |      |          |        |         |         |         |      |         |           |       | 0.79         |               |              |

tid: 100264  
chembl id: [CHEMBL612444](#)  
name: Mitochondrial complex V; ATP synthase:Bos taurus

## similarity analysis

| structure                                                                                                                         | mfp1 | featmfp1 | rdkit7 | pattern | ap_bits | tt_bits | fp2  | pubchem | cdk_maccs | graph | substructure | hybridization | klekota_roth |
|-----------------------------------------------------------------------------------------------------------------------------------|------|----------|--------|---------|---------|---------|------|---------|-----------|-------|--------------|---------------|--------------|
| 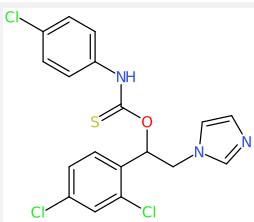<br><a href="#">CHEMBL8376</a><br>IC50:430nM     |      |          |        |         | 0.46    |         |      |         |           |       |              |               |              |
| <br><a href="#">CHEMBL416142</a><br>IC50:6.77μM | 0.69 | 0.76     | 0.43   |         |         |         | 0.57 | 0.82    | 0.82      | 0.60  | 0.93         | 0.56          | 0.51         |
| <br><a href="#">CHEMBL8244</a><br>IC50:3.60μM  |      |          |        | 0.80    |         | 0.45    |      |         |           |       |              |               |              |

tid: 248

chembl id: [CHEMBL1835](#)

name: Thromboxane-A synthase:Homo sapiens

## similarity analysis

| structure                                                                                                                         | mfp1 | featmfp1 | rdkit7 | pattern | ap_bits | tt_bits | fp2  | pubchem | cdk_maccs | graph | substructure | hybridization | klekota_roth |
|-----------------------------------------------------------------------------------------------------------------------------------|------|----------|--------|---------|---------|---------|------|---------|-----------|-------|--------------|---------------|--------------|
| 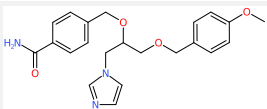<br><a href="#">CHEMBL290637</a><br>IC50:6.00μM  |      |          |        |         | 0.47    |         |      |         |           |       |              |               |              |
| <br><a href="#">CHEMBL33690</a><br>IC50:4.00μM   |      |          |        |         |         |         | 0.54 |         |           |       |              |               |              |
| <br><a href="#">CHEMBL33151</a><br>IC50:840nM  | 0.57 | 0.68     |        |         |         |         | 0.48 |         | 0.86      |       | 0.80         |               |              |
| <br><a href="#">CHEMBL41441</a><br>IC50:9.90μM |      |          |        |         | 0.46    | 0.85    |      |         |           |       |              |               |              |
| <br><a href="#">CHEMBL40983</a><br>IC50:5.40μM |      |          |        |         |         |         |      |         |           | 0.62  |              |               |              |
| <br><a href="#">CHEMBL30604</a><br>IC50:3.00μM |      |          |        |         |         |         |      |         |           |       |              | 0.50          |              |

| structure                                                                                                                            | mfp1 | featmfp1 | rdkit7 | pattern | ap_bits | tt_bits | fp2 | pubchem | cdk_maccs | graph | substructure | hybridization | klekota_roth |
|--------------------------------------------------------------------------------------------------------------------------------------|------|----------|--------|---------|---------|---------|-----|---------|-----------|-------|--------------|---------------|--------------|
| 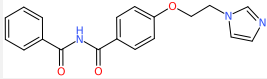 <p><a href="#">CHEMBL33874</a><br/>IC50:180nM</p>  |      |          |        |         |         |         |     |         | 0.71      |       |              |               |              |
|  <p><a href="#">CHEMBL38988</a><br/>IC50:1.61μM</p> |      |          |        |         |         |         |     |         |           |       |              |               | 0.42         |

tid: 12594  
chembl id: [CHEMBL3356](#)  
name: Cytochrome P450 1A2:Homo sapiens

## similarity analysis

| structure                                                                                                                           | mfp1 | featmfp1 | rdkit7 | pattern | ap_bits | tt_bits | fp2  | pubchem | cdk_maccs | graph | substructure | hybridization | klekota_roth |
|-------------------------------------------------------------------------------------------------------------------------------------|------|----------|--------|---------|---------|---------|------|---------|-----------|-------|--------------|---------------|--------------|
| 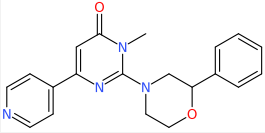<br><a href="#">CHEMBL3091546</a><br>IC50:23.1μM   |      |          |        |         | 0.41    |         |      |         |           |       |              |               |              |
| <br><a href="#">CHEMBL157101</a><br>IC50:26.0μM   | 0.63 | 0.36     |        |         |         |         | 0.46 |         |           |       |              | 0.37          |              |
| <br><a href="#">CHEMBL114555</a><br>IC50:2.24μM  |      |          |        | 0.89    |         |         |      | 0.84    |           |       |              |               |              |
| <br><a href="#">CHEMBL808</a><br>IC50:300nM      |      |          |        |         | 0.32    |         |      |         |           |       |              |               |              |
| <br><a href="#">CHEMBL2030402</a><br>IC50:6.90μM |      |          |        |         |         |         |      |         |           | 0.58  |              |               |              |
| <br><a href="#">CHEMBL256092</a><br>IC50:7.80μM  |      |          |        |         |         |         |      |         | 0.73      |       | 0.88         |               | 0.53         |

| structure                                                                                                              | mfp1 | featmfp1 | rdkit7 | pattern | ap_bits | tt_bits | fp2 | pubchem | cdk_maccs | graph | substructure | hybridization | klekota_roth |
|------------------------------------------------------------------------------------------------------------------------|------|----------|--------|---------|---------|---------|-----|---------|-----------|-------|--------------|---------------|--------------|
| 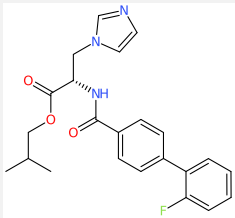 <p>CHEMBL3984743<br/>IC50:21.0μM</p> |      |          |        |         |         |         |     |         |           |       |              |               |              |

0.47



tid: 12912  
chembl id: [CHEMBL3622](#)  
name: Cytochrome P450 2C19:Homo sapiens

## similarity analysis

| structure                                                                                                                          | mfp1 | featmfp1 | rdkit7 | pattern | ap_bits | tt_bits | fp2  | pubchem | cdk_maccs | graph | substructure | hybridization | klekota_roth |
|------------------------------------------------------------------------------------------------------------------------------------|------|----------|--------|---------|---------|---------|------|---------|-----------|-------|--------------|---------------|--------------|
| 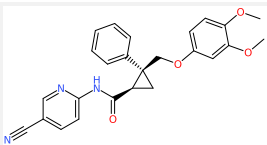<br><a href="#">CHEMBL3343259</a><br>IC50:8.60μM  |      |          |        |         | 0.41    |         |      |         |           |       |              |               |              |
| <br><a href="#">CHEMBL157101</a><br>IC50:15.4μM  | 0.63 | 0.36     |        |         |         |         | 0.46 |         |           | 0.54  |              |               |              |
| <br><a href="#">CHEMBL114555</a><br>IC50:469nM  |      |          |        | 0.89    |         |         |      | 0.84    |           |       |              |               |              |
| <br><a href="#">CHEMBL808</a><br>IC50:40.0nM    |      |          |        |         | 0.32    |         |      |         |           |       |              |               |              |
| <br><a href="#">CHEMBL551964</a><br>IC50:98.0μM |      |          |        |         |         |         |      |         |           |       |              | 0.38          |              |

| structure                                                                                                              | mfp1 | featmfp1 | rdkit7 | pattern | ap_bits | tt_bits | fp2 | pubchem | cdk_maccs | graph | substructure | hybridization | klekota_roth |
|------------------------------------------------------------------------------------------------------------------------|------|----------|--------|---------|---------|---------|-----|---------|-----------|-------|--------------|---------------|--------------|
| 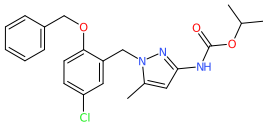 <p>CHEMBL256092<br/>IC50:69.0μM</p>  |      |          |        |         |         |         |     |         | 0.73      |       | 0.88         |               | 0.53         |
|  <p>CHEMBL3984743<br/>IC50:1.16μM</p> |      |          |        |         |         |         |     |         |           |       |              |               | 0.47         |

tid: 12911

chembl id: [CHEMBL3397](#)

name: Cytochrome P450 2C9:Homo sapiens

## similarity analysis

| structure                                                                                                                           | mfp1 | featmfp1 | rdkit7 | pattern | ap_bits | tt_bits | fp2  | pubchem | cdk_maccs | graph | substructure | hybridization | klekota_roth |
|-------------------------------------------------------------------------------------------------------------------------------------|------|----------|--------|---------|---------|---------|------|---------|-----------|-------|--------------|---------------|--------------|
| <br><a href="#">CHEMBL256092</a><br>IC50:17.0μM    |      |          |        |         | 0.41    |         |      |         |           |       | 0.88         |               | 0.53         |
| <br><a href="#">CHEMBL157101</a><br>IC50:24.3μM   |      |          | 0.63   | 0.36    |         |         | 0.46 |         |           |       |              | 0.37          |              |
| <br><a href="#">CHEMBL114555</a><br>IC50:1.44μM  |      |          |        |         | 0.89    |         |      | 0.84    |           |       |              |               |              |
| <br><a href="#">CHEMBL808</a><br>IC50:200nM      |      |          |        |         |         | 0.32    |      |         |           |       |              |               |              |
| <br><a href="#">CHEMBL1090211</a><br>IC50:3.40μM |      |          |        |         |         |         |      |         |           |       | 0.55         |               |              |

| structure                                                                                                                | mfp1 | featmfp1 | rdkit7 | pattern | ap_bits | tt_bits | fp2 | pubchem | cdk_maccs | graph | substructure | hybridization | klekota_roth |
|--------------------------------------------------------------------------------------------------------------------------|------|----------|--------|---------|---------|---------|-----|---------|-----------|-------|--------------|---------------|--------------|
| 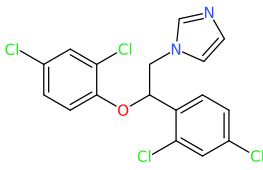<br><b>CHEMBL270902</b><br>IC50:10.00μM | 0.47 |          |        |         |         |         |     |         |           |       |              |               |              |
| <br><b>CHEMBL207293</b><br>IC50:1.90μM  | 0.74 |          |        |         |         |         |     |         |           |       |              |               |              |

tid: 50

chembl id: [CHEMBL213](#)

name: Beta-1 adrenergic receptor:Homo sapiens

## similarity analysis

| structure                                                                                                                           | mfp1 | featmfp1 | rdkit7 | pattern | ap_bits | tt_bits | fp2  | pubchem | cdk_maccs | graph | substructure | hybridization | klekota_roth |
|-------------------------------------------------------------------------------------------------------------------------------------|------|----------|--------|---------|---------|---------|------|---------|-----------|-------|--------------|---------------|--------------|
| 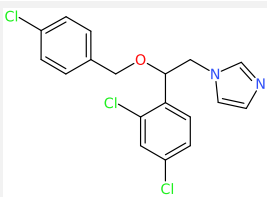<br><a href="#">CHEMBL808</a><br>IC50:12.8µM       |      |          |        |         | 0.39    |         |      |         |           |       |              |               |              |
| <br><a href="#">CHEMBL2348202</a><br>Kd:11.2nM    |      |          | 0.38   |         |         |         | 0.44 |         |           | 0.61  |              |               |              |
| <br><a href="#">CHEMBL91</a><br>IC50:12.6µM      |      |          |        | 0.54    |         |         |      |         |           |       | 0.67         |               |              |
| <br><a href="#">CHEMBL98975</a><br>IC50:40.0nM   |      |          |        | 0.89    |         |         |      | 0.86    |           |       |              |               |              |
| <br><a href="#">CHEMBL434524</a><br>EC50:3.60nM  |      |          |        |         | 0.38    |         |      |         |           |       |              |               |              |
| <br><a href="#">CHEMBL1203992</a><br>EC50:40.0nM |      |          |        |         |         |         |      |         |           |       | 0.47         | 0.39          |              |
| <br><a href="#">CHEMBL467502</a><br>EC50:270nM   |      | 0.55     |        |         |         |         |      |         | 0.72      |       |              |               |              |

tid: 11365  
chembl id: [CHEMBL289](#)  
name: Cytochrome P450 2D6:Homo sapiens

## similarity analysis

| structure                                                                                                                            | mfp1 | featmfp1 | rdkit7 | pattern | ap_bits | tt_bits | fp2  | pubchem | cdk_maccs | graph | substructure | hybridization | klekota_roth |
|--------------------------------------------------------------------------------------------------------------------------------------|------|----------|--------|---------|---------|---------|------|---------|-----------|-------|--------------|---------------|--------------|
| 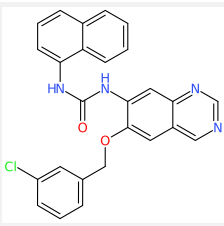<br><a href="#">CHEMBL3634101</a><br>IC50:5.10μM    |      |          |        |         | 0.41    |         |      |         |           |       | 0.75         |               |              |
| <br><a href="#">CHEMBL75</a><br>IC50:10.0nM        |      |          | 0.63   | 0.36    |         |         | 0.46 |         |           |       |              |               |              |
| <br><a href="#">CHEMBL114555</a><br>IC50:3.20μM   |      |          |        |         | 0.89    |         |      | 0.84    |           |       |              |               |              |
| <br><a href="#">CHEMBL4097104</a><br>IC50:100.0nM |      |          | 0.57   |         |         |         | 0.40 |         |           |       |              |               |              |
| <br><a href="#">CHEMBL3265335</a><br>IC50:1.10μM  |      |          |        |         |         |         |      |         |           |       | 0.54         |               |              |

| structure                                                                                                                              | mfp1 | featmfp1 | rdkit7 | pattern | ap_bits | tt_bits | fp2 | pubchem | cdk_maccs | graph | substructure | hybridization | klekota_roth |
|----------------------------------------------------------------------------------------------------------------------------------------|------|----------|--------|---------|---------|---------|-----|---------|-----------|-------|--------------|---------------|--------------|
| 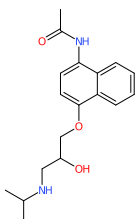 <p><a href="#">CHEMBL359496</a><br/>IC50:100.0μM</p> |      |          |        |         |         |         |     |         |           |       |              | 0.42          |              |
|  <p><a href="#">CHEMBL2018484</a><br/>IC50:392nM</p>  |      |          |        |         |         |         |     |         |           |       |              | 0.72          |              |
|  <p><a href="#">CHEMBL394864</a><br/>IC50:6.60μM</p> |      |          |        |         |         |         |     |         |           |       |              | 0.40          |              |

tid: 20059

chembl id: [CHEMBL5035](#)

name: Heme oxygenase 1:Rattus norvegicus

## similarity analysis

| structure                                                                                                                           | mfp1 | featmfp1 | rdkit7 | pattern | ap_bits | tt_bits | fp2  | pubchem | cdk_maccs | graph | substructure | hybridization | klekota_roth |
|-------------------------------------------------------------------------------------------------------------------------------------|------|----------|--------|---------|---------|---------|------|---------|-----------|-------|--------------|---------------|--------------|
| 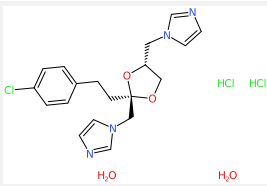<br><a href="#">CHEMBL459907</a><br>IC50:10.00μM   |      |          |        |         | 0.46    |         |      |         |           | 0.64  |              |               |              |
| <br><a href="#">CHEMBL473177</a><br>IC50:1.40μM   |      |          | 0.45   |         |         |         | 0.47 | 0.84    | 0.77      |       |              |               |              |
| <br><a href="#">CHEMBL475163</a><br>IC50:1.03μM  |      |          | 0.67   |         |         |         |      |         |           |       |              |               |              |
| <br><a href="#">CHEMBL4176027</a><br>IC50:13.1μM |      |          | 0.57   |         | 0.85    |         |      |         |           |       |              |               |              |
| <br><a href="#">CHEMBL4161217</a><br>IC50:500nM  |      |          |        |         |         | 0.42    |      |         |           |       |              |               |              |
| <br><a href="#">CHEMBL1363752</a><br>IC50:31.0μM |      |          |        |         |         |         |      |         |           |       |              | 0.52          |              |



| structure                                                                                                                    | mfp1 | featmfp1 | rdkit7 | pattern | ap_bits | tt_bits | fp2 | pubchem | cdk_maccs | graph | substructure | hybridization | klekota_roth |
|------------------------------------------------------------------------------------------------------------------------------|------|----------|--------|---------|---------|---------|-----|---------|-----------|-------|--------------|---------------|--------------|
|  <p><b>CHEMBL284827</b><br/>IC50:28.0μM</p> |      |          |        |         |         |         |     |         |           |       | <b>0.71</b>  |               |              |
|  <p><b>CHEMBL472792</b><br/>IC50:590nM</p>  |      |          |        |         |         |         |     |         |           |       |              |               | <b>0.42</b>  |

tid: 10980  
chembl id: [CHEMBL279](#)  
name: Vascular endothelial growth factor receptor 2:Homo sapiens

## similarity analysis

| structure                                                                                                                           | mfp1 | featmfp1 | rdkit7 | pattern | ap_bits | tt_bits | fp2  | pubchem | cdk_maccs | graph | substructure | hybridization | klekota_roth |
|-------------------------------------------------------------------------------------------------------------------------------------|------|----------|--------|---------|---------|---------|------|---------|-----------|-------|--------------|---------------|--------------|
| <br><a href="#">CHEMBL203003</a><br>IC50:92.0nM    |      |          |        |         | 0.48    |         |      |         |           |       |              |               |              |
| <br><a href="#">CHEMBL3221547</a><br>IC50:500nM  |      |          | 0.34   |         |         |         | 0.46 |         |           |       |              |               |              |
| <br><a href="#">CHEMBL1290247</a><br>IC50:5.00nM |      | 0.65     |        |         |         |         |      |         |           |       |              |               |              |
| <br><a href="#">CHEMBL234202</a><br>IC50:708nM   | 0.53 |          |        | 0.78    |         |         |      |         |           |       |              |               |              |
| <br><a href="#">CHEMBL2206661</a><br>IC50:5.20μM |      |          |        |         | 0.33    |         |      |         |           |       |              |               |              |
| <br><a href="#">CHEMBL1162958</a><br>IC50:766nM  |      |          |        |         |         |         |      |         | 0.65      |       |              |               |              |

| structure                                                                                                                | mfp1 | featmfp1 | rdkit7 | pattern | ap_bits | tt_bits | fp2  | pubchem | cdk_maccs | graph | substructure | hybridization | klekota_roth |
|--------------------------------------------------------------------------------------------------------------------------|------|----------|--------|---------|---------|---------|------|---------|-----------|-------|--------------|---------------|--------------|
| 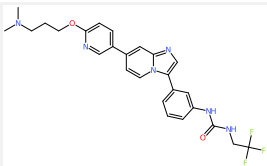 <p>CHEMBL3690500<br/>IC50:35.3nM</p>   |      |          |        |         |         |         |      |         |           |       |              |               | 0.42         |
|  <p>CHEMBL1254752<br/>IC50:32.0nM</p>   |      |          |        |         |         |         | 0.83 |         |           |       |              |               |              |
|  <p>CHEMBL2018751<br/>IC50:5.05μM</p>  |      |          |        |         |         |         |      |         |           |       |              |               | 0.81         |
|  <p>CHEMBL206567<br/>IC50:3.55μM</p>  |      |          |        |         |         |         |      | 0.77    |           |       |              |               |              |
|  <p>CHEMBL2018750<br/>IC50:5.05μM</p> |      |          |        |         |         |         |      |         |           |       |              |               | 0.49         |

tid: 12887

chembl id: [CHEMBL2289](#)

name: Beta-2 adrenergic receptor:Canis lupus familiaris

## similarity analysis

| structure                                                                                                                         | mfp1 | featmfp1 | rdkit7 | pattern | ap_bits | tt_bits | fp2  | pubchem | cdk_maccs | graph | substructure | hybridization | klekota_roth |
|-----------------------------------------------------------------------------------------------------------------------------------|------|----------|--------|---------|---------|---------|------|---------|-----------|-------|--------------|---------------|--------------|
| 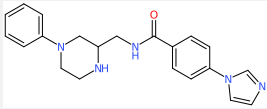<br><a href="#">CHEMBL350847</a><br>IC50:4.30μM  |      |          |        |         | 0.37    |         |      |         |           |       |              |               |              |
| <br><a href="#">CHEMBL6995</a><br>Kd:186nM       |      |          | 0.33   |         |         |         | 0.41 |         |           |       |              | 0.43          |              |
| <br><a href="#">CHEMBL143608</a><br>Ki:5.30μM  |      |          | 0.47   |         |         |         |      |         |           |       |              |               |              |
| <br><a href="#">CHEMBL98975</a><br>IC50:280nM  | 0.47 |          |        | 0.89    |         | 0.36    |      | 0.86    | 0.66      |       |              |               | 0.29         |
| <br><a href="#">CHEMBL142635</a><br>Ki:1.00μM  |      |          |        |         |         |         |      |         |           | 0.51  |              |               |              |
| <br><a href="#">CHEMBL99585</a><br>IC50:46.5μM |      |          |        |         |         |         |      |         |           |       | 0.48         |               |              |

tid: 106616  
chembl id: [CHEMBL2366472](#)  
name: 15-cis-phytoene desaturase:Synechococcus elongatus  
(strain PCC 7942) (Anacystis nidulans R2)

## similarity analysis

| structure                                                                                                                           | mfp1 | featmfp1 | rdkit7 | pattern | ap_bits | tt_bits | fp2  | pubchem | cdk_maccs | graph | substructure | hybridization | klekota_roth |
|-------------------------------------------------------------------------------------------------------------------------------------|------|----------|--------|---------|---------|---------|------|---------|-----------|-------|--------------|---------------|--------------|
| 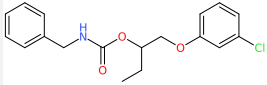<br><a href="#">CHEMBL2272986</a><br>IC50:50.1nM   |      |          |        |         | 0.49    |         |      |         |           |       |              |               |              |
| <br><a href="#">CHEMBL2272975</a><br>IC50:50.1nM   |      |          | 0.47   |         |         | 0.46    | 0.51 |         |           |       |              | 0.50          |              |
| <br><a href="#">CHEMBL2272700</a><br>IC50:5.20μM |      |          | 0.54   |         |         |         |      |         |           |       |              |               |              |
| <br><a href="#">CHEMBL2272703</a><br>IC50:63.1nM |      |          |        | 0.81    |         |         |      |         | 0.64      |       |              |               |              |
| <br><a href="#">CHEMBL2272713</a><br>IC50:3.98μM |      |          |        |         |         |         |      | 0.62    |           | 0.58  |              |               |              |
| <br><a href="#">CHEMBL2272974</a><br>IC50:7.94μM |      |          |        |         |         |         |      |         |           |       |              | 0.59          |              |
| <br><a href="#">CHEMBL2272987</a><br>IC50:3.16μM | 0.56 |          |        |         |         |         |      |         |           |       |              |               | 0.65         |

tid: 261  
 · chembl id: [CHEMBL1811](#)  
 name: Prostanoid EP1 receptor:Homo sapiens

## similarity analysis

| structure                                                                                                                          | mfp1 | featmfp1 | rdkit7 | pattern | ap_bits | tt_bits | fp2  | pubchem | cdk_maccs | graph | substructure | hybridization | klekota_roth |
|------------------------------------------------------------------------------------------------------------------------------------|------|----------|--------|---------|---------|---------|------|---------|-----------|-------|--------------|---------------|--------------|
| 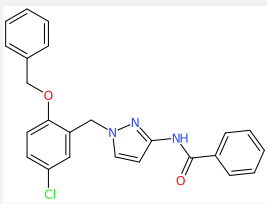<br><a href="#">CHEMBL255485</a><br>IC50:251nM    |      |          |        |         | 0.46    |         |      |         |           |       |              |               |              |
| <br><a href="#">CHEMBL3301604</a><br>Ki:9.60μM   |      |          | 0.36   |         |         |         | 0.46 |         |           |       |              | 0.36          |              |
| <br><a href="#">CHEMBL180046</a><br>Ki:4.47nM   |      | 0.55     |        |         |         |         |      |         |           |       |              |               |              |
| <br><a href="#">CHEMBL124199</a><br>Ki:230nM    |      |          |        |         | 0.71    |         |      |         |           |       |              |               |              |
| <br><a href="#">CHEMBL429321</a><br>IC50:79.4nM |      |          |        |         |         | 0.27    |      |         |           |       |              |               | 0.60         |
| <br><a href="#">CHEMBL207293</a><br>IC50:126nM  |      |          |        |         |         |         |      |         |           |       | 0.53         |               |              |

| structure                                                                                                                               | mfp1 | featmfp1 | rdkit7 | pattern | ap_bits | tt_bits | fp2 | pubchem | cdk_maccs | graph | substructure | hybridization | klekota_roth |
|-----------------------------------------------------------------------------------------------------------------------------------------|------|----------|--------|---------|---------|---------|-----|---------|-----------|-------|--------------|---------------|--------------|
| 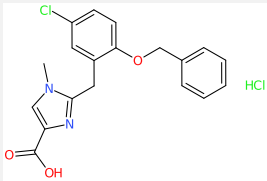 <p><a href="#">CHEMBL535640</a><br/>IC50:316nM</p>    |      |          |        |         |         |         |     | 0.73    |           |       |              |               |              |
|  <p><a href="#">CHEMBL258226</a><br/>IC50:79.4nM</p>   |      |          |        |         |         |         |     |         |           |       | 0.88         |               |              |
|  <p><a href="#">CHEMBL258183</a><br/>IC50:50.1nM</p>   |      |          |        |         |         |         |     | 0.47    |           |       |              |               |              |
|  <p><a href="#">CHEMBL253538</a><br/>IC50:79.4nM</p> |      |          |        |         |         |         |     | 0.76    |           |       |              |               |              |

tid: 17045  
chembl id: [CHEMBL340](#)  
name: Cytochrome P450 3A4:Homo sapiens

## similarity analysis

| structure                                                                                                                           | mfp1 | featmfp1 | rdkit7 | pattern | ap_bits | tt_bits | fp2  | pubchem | cdk_maccs | graph | substructure | hybridization | klekota_roth |
|-------------------------------------------------------------------------------------------------------------------------------------|------|----------|--------|---------|---------|---------|------|---------|-----------|-------|--------------|---------------|--------------|
| 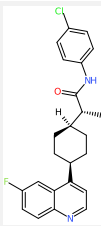<br><a href="#">CHEMBL4161733</a><br>IC50:5.10μM   |      |          |        |         |         |         | 0.41 |         |           |       |              |               |              |
| <br><a href="#">CHEMBL2448692</a><br>IC50:700nM   |      |          |        |         | 0.50    |         | 0.53 |         |           |       |              | 0.56          |              |
| <br><a href="#">CHEMBL3922888</a><br>IC50:185nM  |      |          |        |         |         |         |      |         |           |       | 0.66         |               |              |
| <br><a href="#">CHEMBL258502</a><br>IC50:45.0nM  |      |          |        |         |         | 0.85    |      |         |           |       |              |               |              |
| <br><a href="#">CHEMBL4097104</a><br>IC50:20.0nM |      |          |        |         | 0.57    |         | 0.40 |         |           |       |              |               |              |



| structure                                                                                                                                | mfp1 | featmfp1 | rdkit7 | pattern | ap_bits | tt_bits | fp2 | pubchem | cdk_maccs | graph | substructure | hybridization | klekota_roth |
|------------------------------------------------------------------------------------------------------------------------------------------|------|----------|--------|---------|---------|---------|-----|---------|-----------|-------|--------------|---------------|--------------|
| 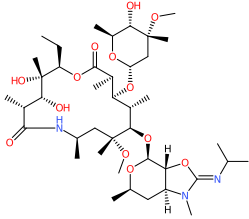 <p><a href="#">CHEMBL2159133</a><br/>IC50:1.00μM</p>   |      |          |        |         |         |         |     |         |           | 0.58  |              |               |              |
|  <p><a href="#">CHEMBL113018</a><br/>IC50:5.67μM</p>    |      |          |        |         |         |         |     | 0.82    |           |       |              |               |              |
|  <p><a href="#">CHEMBL519549</a><br/>IC50:16.0μM</p>   |      |          |        |         |         |         |     |         |           |       | 0.81         |               |              |
|  <p><a href="#">CHEMBL2018485</a><br/>IC50:12.6μM</p> |      |          |        |         |         |         |     | 0.72    |           |       |              |               |              |
|  <p><a href="#">CHEMBL394864</a><br/>IC50:6.80μM</p>  |      |          |        |         |         |         |     |         |           |       |              | 0.40          |              |

tid: 226

chembl id: [CHEMBL246](#)

name: Beta-3 adrenergic receptor:Homo sapiens

## similarity analysis

| structure                                                                                                                                 | mfp1 | featmfp1 | rdkit7 | pattern | ap_bits | tt_bits | fp2  | pubchem | cdk_maccs | graph | substructure | hybridization | klekota_roth |
|-------------------------------------------------------------------------------------------------------------------------------------------|------|----------|--------|---------|---------|---------|------|---------|-----------|-------|--------------|---------------|--------------|
| 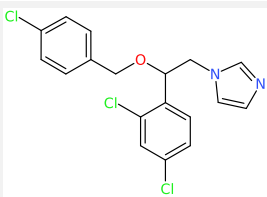 <p><a href="#">CHEMBL808</a><br/>IC50:6.15μM</p>        |      |          |        |         | 0.39    |         |      |         |           |       |              |               |              |
|  <p><a href="#">CHEMBL13106</a><br/>EC50:2.60nM</p>     |      |          | 0.37   |         |         |         | 0.44 |         |           |       |              |               |              |
|  <p><a href="#">CHEMBL91</a><br/>IC50:5.48μM</p>       |      |          | 0.54   |         |         |         |      |         |           |       |              |               |              |
|  <p><a href="#">CHEMBL466879</a><br/>EC50:510nM</p>    |      |          |        | 0.82    |         |         |      |         |           |       |              |               |              |
|  <p><a href="#">CHEMBL434524</a><br/>EC50:1.60nM</p>   |      |          |        |         | 0.38    |         |      |         |           |       |              |               |              |
|  <p><a href="#">CHEMBL2348201</a><br/>EC50:10.00μM</p> |      |          |        |         |         |         |      |         |           | 0.57  |              |               |              |
|  <p><a href="#">CHEMBL1203992</a><br/>EC50:2.30μM</p>  |      |          |        |         |         |         |      |         |           |       |              | 0.47          | 0.39         |

| structure                                                                                                        | mfp1 | featmfp1 | rdkit7 | pattern | ap_bits | tt_bits | fp2 | pubchem | cdk_maccs | graph | substructure | hybridization | klekota_roth |
|------------------------------------------------------------------------------------------------------------------|------|----------|--------|---------|---------|---------|-----|---------|-----------|-------|--------------|---------------|--------------|
| 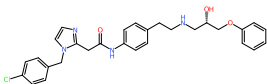<br>CHEMBL467502<br>EC50:74.0nM | 0.55 |          |        |         |         |         |     | 0.83    | 0.72      |       |              |               |              |
| <br>CHEMBL1262<br>IC50:4.74μM   |      |          |        |         |         |         |     |         |           |       | 0.69         |               |              |

tid: 12167  
chembl id: [CHEMBL4980](#)  
name: Neuronal acetylcholine receptor protein alpha-7 sub-unit:Rattus norvegicus

## similarity analysis

| structure                                                                                                                           | mfp1 | featmfp1 | rdkit7 | pattern | ap_bits | tt_bits | fp2  | pubchem | cdk_maccs | graph | substructure | hybridization | klekota_roth |
|-------------------------------------------------------------------------------------------------------------------------------------|------|----------|--------|---------|---------|---------|------|---------|-----------|-------|--------------|---------------|--------------|
| 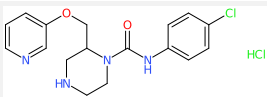<br><a href="#">CHEMBL3262153</a><br>IC50:70.0nM   | 0.50 |          |        |         | 0.52    |         |      |         |           | 0.56  |              |               |              |
| <br><a href="#">CHEMBL193743</a><br>Ki:10.0nM     |      | 0.69     | 0.38   |         |         | 0.34    | 0.47 |         |           |       |              | 0.48          |              |
| <br><a href="#">CHEMBL3262155</a><br>IC50:9.50nM |      |          |        | 0.77    |         |         |      |         | 0.73      |       | 0.69         |               |              |
| <br><a href="#">CHEMBL403376</a><br>EC50:10.00μM |      |          |        |         |         |         |      | 0.78    |           |       |              |               |              |
| <br><a href="#">CHEMBL2441754</a><br>Ki:94.0μM   |      |          |        |         |         |         |      |         |           |       |              |               | 0.40         |

tid: 11280

chembl id: [CHEMBL3227](#)

name: Metabotropic glutamate receptor 5:Homo sapiens

## similarity analysis

| structure                                                                                                                           | mfp1 | featmfp1 | rdkit7 | pattern | ap_bits | tt_bits | fp2  | pubchem | cdk_maccs | graph | substructure | hybridization | klekota_roth |
|-------------------------------------------------------------------------------------------------------------------------------------|------|----------|--------|---------|---------|---------|------|---------|-----------|-------|--------------|---------------|--------------|
| 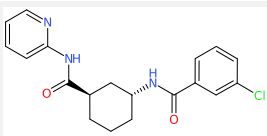<br><a href="#">CHEMBL2338561</a><br>IC50:5.00µM   |      |          |        |         | 0.43    |         |      |         |           |       |              |               |              |
| <br><a href="#">CHEMBL206998</a><br>Ki:33.0nM     |      |          | 0.37   | 0.79    |         |         | 0.43 |         |           |       |              | 0.35          |              |
| <br><a href="#">CHEMBL3655656</a><br>IC50:260nM  |      |          |        | 0.63    |         |         |      |         |           |       |              |               |              |
| <br><a href="#">CHEMBL212129</a><br>IC50:102nM   |      |          |        |         |         |         | 0.25 |         |           |       |              |               |              |
| <br><a href="#">CHEMBL3983913</a><br>EC50:60.0nM |      |          |        |         |         |         |      |         |           | 0.58  |              |               |              |

| structure                                                                                                                                | mfp1 | featmfp1 | rdkit7 | pattern | ap_bits | tt_bits | fp2  | pubchem | cdk_maccs | graph | substructure | hybridization | klekota_roth |
|------------------------------------------------------------------------------------------------------------------------------------------|------|----------|--------|---------|---------|---------|------|---------|-----------|-------|--------------|---------------|--------------|
| 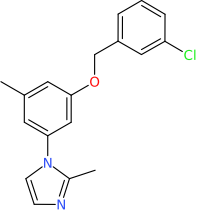 <p><a href="#">CHEMBL207733</a><br/>Ki:27.0nM</p>      |      |          |        |         |         |         |      | 0.78    |           |       |              |               |              |
|  <p><a href="#">CHEMBL1630060</a><br/>IC50:501nM</p>    |      |          |        |         |         |         |      |         |           |       | 0.76         |               |              |
|  <p><a href="#">CHEMBL3660209</a><br/>IC50:390nM</p>   |      |          |        |         |         |         | 0.54 |         |           |       |              |               |              |
|  <p><a href="#">CHEMBL395644</a><br/>EC50:280nM</p>   |      |          |        |         |         |         |      |         |           | 0.71  |              |               |              |
|  <p><a href="#">CHEMBL1630062</a><br/>IC50:2.51μM</p> |      |          |        |         |         |         |      |         |           |       |              | 0.66          |              |

tid: 10116  
chembl id: [CHEMBL2882](#)  
name: Histamine H2 receptor:Cavia porcellus

## similarity analysis

| structure                                                                                                                        | mfp1 | featmfp1 | rdkit7 | pattern | ap_bits | tt_bits | fp2  | pubchem | cdk_maccs | graph | substructure | hybridization | klekota_roth |
|----------------------------------------------------------------------------------------------------------------------------------|------|----------|--------|---------|---------|---------|------|---------|-----------|-------|--------------|---------------|--------------|
| 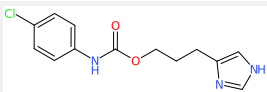<br><a href="#">CHEMBL16231</a><br>Ki:79.4μM    | 0.44 |          | 0.39   |         | 0.49    |         | 0.44 | 0.74    |           |       |              | 0.39          | 0.60         |
| <br><a href="#">CHEMBL274989</a><br>Ki:63.1μM   |      | 0.53     |        |         |         |         |      |         |           |       |              |               |              |
| <br><a href="#">CHEMBL81520</a><br>Kd:631nM   |      |          |        | 0.76    |         | 0.30    |      |         |           | 0.51  |              |               |              |
| <br><a href="#">CHEMBL277149</a><br>Ki:79.4μM |      |          |        |         |         |         |      |         |           |       | 0.69         |               |              |
| <br><a href="#">CHEMBL309659</a><br>Kd:316nM  |      |          |        |         |         |         |      |         | 0.65      |       |              |               |              |

tid: 11300  
chembl id: [CHEMBL4124](#)  
name: Histamine H3 receptor:Rattus norvegicus

## similarity analysis

| structure                                                                                                                        | mfp1 | featmfp1 | rdkit7 | pattern | ap_bits | tt_bits | fp2  | pubchem | cdk_maccs | graph | substructure | hybridization | klekota_roth |
|----------------------------------------------------------------------------------------------------------------------------------|------|----------|--------|---------|---------|---------|------|---------|-----------|-------|--------------|---------------|--------------|
| 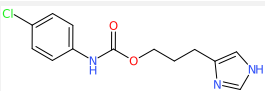<br><a href="#">CHEMBL16231</a><br>Ki:4.09nM    | 0.44 |          |        |         | 0.49    | 0.27    | 0.44 |         |           |       |              |               | 0.60         |
| <br><a href="#">CHEMBL274989</a><br>Ki:24.6nM   | 0.53 |          |        |         |         |         |      |         |           |       |              |               |              |
| <br><a href="#">CHEMBL101692</a><br>Ki:56.2nM |      |          |        | 0.83    |         |         |      |         |           |       |              |               |              |
| <br><a href="#">CHEMBL16640</a><br>Ki:26.0nM  | 0.39 |          |        |         |         |         |      |         |           |       |              |               |              |
| <br><a href="#">CHEMBL60509</a><br>Ki:44.7nM  |      |          |        |         |         |         |      |         | 0.52      |       |              |               |              |
| <br><a href="#">CHEMBL2387307</a><br>Ki:135nM |      |          |        |         |         |         |      |         |           |       |              | 0.42          |              |
| <br><a href="#">CHEMBL124187</a><br>Ki:21.0nM |      |          |        |         |         |         | 0.78 |         |           |       |              |               |              |
| <br><a href="#">CHEMBL277149</a><br>Ki:13.3nM |      |          |        |         |         |         |      |         |           |       |              | 0.69          |              |



| structure                                                                                                          | mfp1 | featmfp1 | rdkit7 | pattern | ap_bits | tt_bits | fp2 | pubchem | cdk_maccs | graph | substructure | hybridization | klekota_roth |
|--------------------------------------------------------------------------------------------------------------------|------|----------|--------|---------|---------|---------|-----|---------|-----------|-------|--------------|---------------|--------------|
| 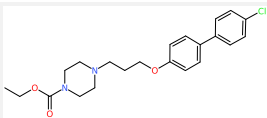 <p>CHEMBL105385<br/>Ki:191nM</p> |      |          |        |         |         |         |     |         | 0.68      |       |              |               |              |

tid: 17074  
chembl id: [CHEMBL3943](#)  
name: Histamine H1 receptor:Cavia porcellus

## similarity analysis

| structure                                                                                                                          | mfp1 | featmfp1 | rdkit7 | pattern | ap_bits | tt_bits | fp2  | pubchem | cdk_maccs | graph | substructure | hybridization | klekota_roth |
|------------------------------------------------------------------------------------------------------------------------------------|------|----------|--------|---------|---------|---------|------|---------|-----------|-------|--------------|---------------|--------------|
| 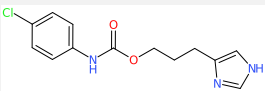<br><a href="#">CHEMBL16231</a><br>Ki:63.1μM      | 0.44 |          | 0.39   |         | 0.49    | 0.27    | 0.44 |         |           |       |              | 0.39          | 0.60         |
| <br><a href="#">CHEMBL274989</a><br>Ki:79.4μM     | 0.53 |          |        |         |         |         |      |         |           |       |              |               |              |
| <br><a href="#">CHEMBL371730</a><br>Ki:290nM    |      |          |        | 0.78    |         |         |      |         |           |       |              |               |              |
| <br><a href="#">CHEMBL286017</a><br>Kd:3.98nM   |      |          |        |         |         |         |      |         | 0.47      |       |              |               |              |
| <br><a href="#">CHEMBL276735</a><br>IC50:6.90nM |      |          |        |         |         |         |      | 0.76    |           |       |              |               |              |
| <br><a href="#">CHEMBL277149</a><br>Ki:15.8μM   |      |          |        |         |         |         |      |         |           |       | 0.69         |               |              |
| <br><a href="#">CHEMBL1910379</a><br>Kd:20.4nM  |      |          |        |         |         |         |      |         | 0.69      |       |              |               |              |

tid: 103036  
chembl id: [CHEMBL1075110](#)  
name: Sterol 14-alpha demethylase:Trypanosoma cruzi (strain CL Brener)

## similarity analysis

| structure                                                                                                                            | mfp1 | featmfp1 | rdkit7 | pattern | ap_bits | tt_bits | fp2  | pubchem | cdk_maccs | graph | substructure | hybridization | klekota_roth |
|--------------------------------------------------------------------------------------------------------------------------------------|------|----------|--------|---------|---------|---------|------|---------|-----------|-------|--------------|---------------|--------------|
| 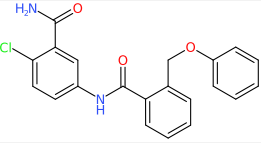<br><a href="#">CHEMBL3431227</a><br>IC50:79.4µM    |      |          |        |         | 0.48    |         |      |         |           |       |              |               |              |
| <br><a href="#">CHEMBL3431397</a><br>IC50:63.1nM   |      |          | 0.38   |         |         |         | 0.45 |         |           |       |              | 0.40          |              |
| <br><a href="#">CHEMBL3431305</a><br>IC50:63.1nM  |      |          | 0.67   |         |         |         |      |         | 0.69      |       |              |               |              |
| <br><a href="#">CHEMBL2326052</a><br>Kd:210nM     |      |          |        | 0.78    |         |         |      |         |           |       |              |               |              |
| <br><a href="#">CHEMBL3431250</a><br>IC50:158nM   |      |          |        |         | 0.36    |         |      |         |           |       |              |               |              |
| <br><a href="#">CHEMBL3431307</a><br>IC50:100.0nM |      |          |        |         |         |         |      |         |           | 0.49  |              |               |              |
| <br><a href="#">CHEMBL3431242</a><br>IC50:50.1nM  |      |          |        |         |         |         |      | 0.79    |           |       | 0.79         |               |              |

| structure                                                                                                                              | mfp1 | featmfp1 | rdkit7 | pattern | ap_bits | tt_bits | fp2 | pubchem | cdk_maccs | graph | substructure | hybridization | klekota_roth |
|----------------------------------------------------------------------------------------------------------------------------------------|------|----------|--------|---------|---------|---------|-----|---------|-----------|-------|--------------|---------------|--------------|
| 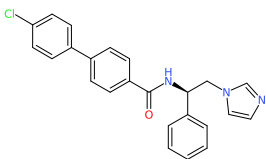 <p><a href="#">CHEMBL1236676</a><br/>Kd:70.0nM</p>   | 0.58 |          |        |         |         |         |     |         |           |       |              |               |              |
|  <p><a href="#">CHEMBL3431205</a><br/>IC50:25.1μM</p> |      |          |        |         |         |         |     |         |           |       |              |               | 0.40         |

tid: 10979  
chembl id: [CHEMBL1868](#)  
name: Vascular endothelial growth factor receptor 1:Homo sapiens

## similarity analysis

| structure                                                                                                                           | mfp1 | featmfp1 | rdkit7 | pattern | ap_bits | tt_bits | fp2  | pubchem | cdk_maccs | graph | substructure | hybridization | klekota_roth |
|-------------------------------------------------------------------------------------------------------------------------------------|------|----------|--------|---------|---------|---------|------|---------|-----------|-------|--------------|---------------|--------------|
| 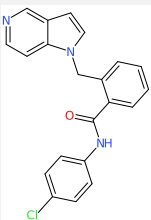<br><a href="#">CHEMBL203003</a><br>IC50:220nM     |      |          |        |         | 0.48    |         |      |         |           |       |              |               |              |
| <br><a href="#">CHEMBL147192</a><br>IC50:100.0nM |      |          | 0.32   |         |         |         | 0.44 | 0.75    |           |       |              |               |              |
| <br><a href="#">CHEMBL4286029</a><br>IC50:1.90μM |      |          | 0.61   |         |         |         |      |         |           |       |              |               |              |
| <br><a href="#">CHEMBL234202</a><br>IC50:940nM   | 0.53 |          |        | 0.78    |         |         |      |         |           |       |              |               |              |
| <br><a href="#">CHEMBL101683</a><br>IC50:180nM   |      |          |        |         |         | 0.27    |      |         |           |       |              |               |              |
| <br><a href="#">CHEMBL1336</a><br>IC50:45.2nM    |      |          |        |         |         |         |      |         |           | 0.53  |              |               |              |

| structure                                                                                                                                | mfp1 | featmfp1 | rdkit7 | pattern | ap_bits | tt_bits | fp2 | pubchem | cdk_maccs | graph | substructure | hybridization | klekota_roth |
|------------------------------------------------------------------------------------------------------------------------------------------|------|----------|--------|---------|---------|---------|-----|---------|-----------|-------|--------------|---------------|--------------|
| 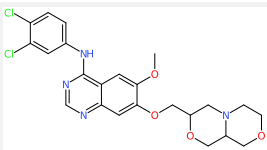 <p><a href="#">CHEMBL3943570</a><br/>IC50:50.0nM</p>   |      |          |        |         |         |         |     |         |           |       |              | 0.36          |              |
|  <p><a href="#">CHEMBL1975927</a><br/>Ki:251nM</p>      |      |          |        |         |         |         |     |         |           |       |              | 0.73          |              |
|  <p><a href="#">CHEMBL205413</a><br/>IC50:1.16μM</p>   |      |          |        |         |         |         |     |         |           |       | 0.70         |               |              |
|  <p><a href="#">CHEMBL3660290</a><br/>IC50:16.0nM</p> |      |          |        |         |         |         |     |         |           |       |              | 0.41          |              |

tid: 11289  
chembl id: [CHEMBL3229](#)  
name: Anandamide amidohydrolase:Rattus norvegicus

## similarity analysis

| structure                                                                                                                           | mfp1 | featmfp1 | rdkit7 | pattern | ap_bits | tt_bits | fp2  | pubchem | cdk_maccs | graph | substructure | hybridization | klekota_roth |
|-------------------------------------------------------------------------------------------------------------------------------------|------|----------|--------|---------|---------|---------|------|---------|-----------|-------|--------------|---------------|--------------|
| 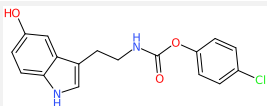<br><a href="#">CHEMBL241137</a><br>IC50:6.80μM    |      |          |        |         | 0.45    |         |      |         |           |       |              |               |              |
| <br><a href="#">CHEMBL3585522</a><br>IC50:290nM   |      |          |        | 0.80    |         |         | 0.38 | 0.80    |           |       |              |               |              |
| <br><a href="#">CHEMBL3683934</a><br>IC50:4.00μM |      |          | 0.58   |         |         |         |      |         |           |       |              |               |              |
| <br><a href="#">CHEMBL598974</a><br>IC50:558nM   |      |          | 0.36   |         |         |         |      |         |           |       |              | 0.42          |              |
| <br><a href="#">CHEMBL541244</a><br>IC50:17.0μM  |      |          |        |         | 0.37    |         |      |         |           |       |              |               | 0.53         |
| <br><a href="#">CHEMBL482959</a><br>IC50:610nM   |      |          |        |         |         |         |      |         |           | 0.56  |              |               |              |

| structure                                                                                                         | mfp1 | featmfp1 | rdkit7 | pattern | ap_bits | tt_bits | fp2 | pubchem | cdk_maccs | graph | substructure | hybridization | klekota_roth |
|-------------------------------------------------------------------------------------------------------------------|------|----------|--------|---------|---------|---------|-----|---------|-----------|-------|--------------|---------------|--------------|
| 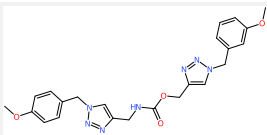<br>CHEMBL4218592<br>IC50:5.80nM |      |          |        |         |         |         |     |         |           |       | 0.93         |               |              |
| <br>CHEMBL2164601<br>IC50:520nM  | 0.51 |          |        |         |         |         |     |         |           |       |              |               |              |
| <br>CHEMBL2207351<br>IC50:119nM  |      |          |        |         |         |         |     |         | 0.72      |       |              |               |              |



|            |                            |                   |
|------------|----------------------------|-------------------|
| tid:       | 12608                      |                   |
| chembl id: | <a href="#">CHEMBL4772</a> |                   |
| name:      | 1-acylglycerol-3-phosphate | O-acyltransferase |
|            | beta:Homo sapiens          |                   |

## similarity analysis

| structure                                                                                                                               | mfp1 | featmfp1 | rdkit7      | pattern     | ap_bits | tt_bits | fp2         | pubchem | cdk_maccs   | graph       | substructure | hybridization | klekota_roth |
|-----------------------------------------------------------------------------------------------------------------------------------------|------|----------|-------------|-------------|---------|---------|-------------|---------|-------------|-------------|--------------|---------------|--------------|
| 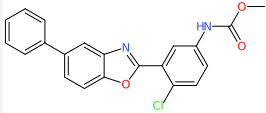 <p><a href="#">CHEMBL36197</a><br/>IC50:64.0μM</p>    |      |          |             |             |         |         | <b>0.34</b> |         |             |             |              |               |              |
|  <p><a href="#">CHEMBL418604</a><br/>IC50:60.0nM</p>  |      |          | <b>0.59</b> | <b>0.35</b> |         |         | <b>0.41</b> |         | <b>0.66</b> |             |              |               |              |
|  <p><a href="#">CHEMBL193911</a><br/>IC50:50.0nM</p> |      |          |             |             |         |         | <b>0.67</b> |         |             |             |              |               |              |
|  <p><a href="#">CHEMBL75791</a><br/>IC50:1.10μM</p>  |      |          |             |             |         |         | <b>0.28</b> |         |             |             |              |               |              |
|  <p><a href="#">CHEMBL35967</a><br/>IC50:100.0nM</p> |      |          |             |             |         |         |             |         |             | <b>0.46</b> |              |               |              |
|  <p><a href="#">CHEMBL35615</a><br/>IC50:12.0μM</p>  |      |          |             |             |         |         |             |         |             |             |              | <b>0.38</b>   |              |

| structure                                                                                                                   | mfp1 | featmfp1 | rdkit7 | pattern | ap_bits | tt_bits | fp2  | pubchem | cdk_maccs | graph | substructure | hybridization | klekota_roth |
|-----------------------------------------------------------------------------------------------------------------------------|------|----------|--------|---------|---------|---------|------|---------|-----------|-------|--------------|---------------|--------------|
| 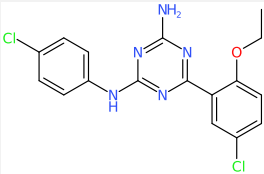 <p><b>CHEMBL193589</b><br/>IC50:191nM</p> |      |          |        |         |         |         | 0.70 |         |           |       |              |               |              |
|  <p><b>CHEMBL290583</b><br/>IC50:650nM</p> | 0.39 |          |        |         |         |         |      |         |           |       | 0.87         |               |              |
|  <p><b>CHEMBL34893</b><br/>IC50:16.0μM</p> |      |          |        |         |         |         |      |         |           |       |              |               | 0.55         |

tid: 103696  
chembl id: [CHEMBL1293263](#)  
name: M18 aspartyl aminopeptidase:Plasmodium falciparum 3D7

## similarity analysis

| structure                                                                                                                           | mfp1 | featmfp1 | rdkit7 | pattern | ap_bits | tt_bits | fp2  | pubchem | cdk_maccs | graph | substructure | hybridization | klekota_roth |
|-------------------------------------------------------------------------------------------------------------------------------------|------|----------|--------|---------|---------|---------|------|---------|-----------|-------|--------------|---------------|--------------|
| 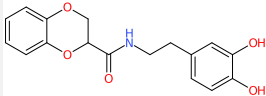<br><a href="#">CHEMBL1417867</a><br>IC50:2.11μM   |      |          |        |         | 0.35    |         |      |         |           |       |              |               |              |
| <br><a href="#">CHEMBL1503953</a><br>IC50:2.60μM  |      |          |        |         |         |         | 0.36 |         | 0.68      |       |              |               |              |
| <br><a href="#">CHEMBL1491018</a><br>IC50:832nM  |      |          | 0.54   | 0.30    |         |         |      | 0.71    |           |       | 0.87         | 0.29          |              |
| <br><a href="#">CHEMBL1413985</a><br>IC50:2.51μM |      |          |        |         | 0.68    |         |      |         |           |       |              |               |              |
| <br><a href="#">CHEMBL1378749</a><br>IC50:1.76μM |      |          |        |         |         | 0.22    |      |         |           |       |              |               |              |

| structure                                                                                                                               | mfp1 | featmfp1 | rdkit7 | pattern | ap_bits | tt_bits | fp2 | pubchem | cdk_maccs | graph | substructure | hybridization | klekota_roth |
|-----------------------------------------------------------------------------------------------------------------------------------------|------|----------|--------|---------|---------|---------|-----|---------|-----------|-------|--------------|---------------|--------------|
| 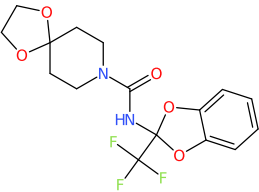 <p><a href="#">CHEMBL1462474</a><br/>IC50:2.78μM</p>  |      |          |        |         |         |         |     |         |           | 0.44  |              |               |              |
|  <p><a href="#">CHEMBL1488151</a><br/>IC50:1.47μM</p>  |      |          |        |         |         |         |     |         |           | 0.39  |              |               |              |
|  <p><a href="#">CHEMBL1612425</a><br/>IC50:5.07μM</p> |      |          |        |         |         |         |     |         |           |       |              |               | 0.40         |

tid: 12886  
chembl id: [CHEMBL2731](#)  
name: Galanin receptor 3:Homo sapiens

## similarity analysis

| structure                                                                                                                           | mfp1 | featmfp1 | rdkit7 | pattern | ap_bits | tt_bits | fp2  | pubchem | cdk_maccs | graph | substructure | hybridization | klekota_roth |
|-------------------------------------------------------------------------------------------------------------------------------------|------|----------|--------|---------|---------|---------|------|---------|-----------|-------|--------------|---------------|--------------|
| 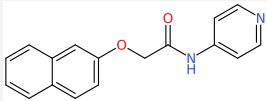<br><a href="#">CHEMBL1603921</a><br>IC50:1.77μM   | 0.50 |          |        |         | 0.44    |         |      |         |           |       |              |               |              |
| <br><a href="#">CHEMBL1510261</a><br>IC50:1.57μM  |      |          | 0.40   |         |         |         | 0.48 |         |           | 0.56  |              | 0.50          |              |
| <br><a href="#">CHEMBL1417355</a><br>IC50:1.40μM | 0.65 |          |        |         |         |         |      |         |           |       |              |               |              |
| <br><a href="#">CHEMBL1705098</a><br>IC50:158nM  |      |          |        | 0.77    |         |         |      |         |           |       |              |               |              |
| <br><a href="#">CHEMBL1424583</a><br>IC50:399nM  |      |          |        |         | 0.32    |         |      |         |           |       |              |               |              |
| <br><a href="#">CHEMBL1457690</a><br>IC50:5.02μM |      |          |        |         |         |         | 0.74 |         |           |       |              |               |              |

| structure                                                                                                                              | mfp1 | featmfp1 | rdkit7 | pattern | ap_bits | tt_bits | fp2 | pubchem | cdk_maccs | graph | substructure | hybridization | klekota_roth |
|----------------------------------------------------------------------------------------------------------------------------------------|------|----------|--------|---------|---------|---------|-----|---------|-----------|-------|--------------|---------------|--------------|
| 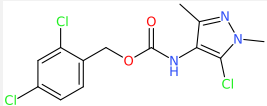 <p><a href="#">CHEMBL1478769</a><br/>IC50:2.13μM</p> |      |          |        |         |         |         |     |         |           |       | 0.87         |               |              |
|  <p><a href="#">CHEMBL1376266</a><br/>IC50:762nM</p>  |      |          |        |         |         |         |     |         | 0.66      |       |              |               |              |
|  <p><a href="#">CHEMBL2355112</a><br/>IC50:400nM</p>  |      |          |        |         |         |         |     |         |           |       |              |               | 0.40         |

tid: 10808

chembl id: [CHEMBL3819](#)

name: Lysophosphatidic acid receptor Edg-2:Homo sapiens

## similarity analysis

| structure                                                                                                                                | mfp1 | featmfp1 | rdkit7 | pattern | ap_bits | tt_bits | fp2  | pubchem | cdk_maccs | graph | substructure | hybridization | klekota_roth |
|------------------------------------------------------------------------------------------------------------------------------------------|------|----------|--------|---------|---------|---------|------|---------|-----------|-------|--------------|---------------|--------------|
| 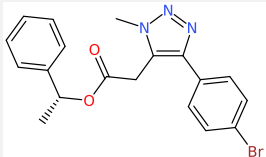 <p><a href="#">CHEMBL4111515</a><br/>IC50:21.9µM</p>   |      |          |        |         | 0.39    |         |      |         |           |       |              |               |              |
|  <p><a href="#">CHEMBL2182056</a><br/>IC50:3.59µM</p>  | 0.44 |          |        |         |         |         | 0.30 |         | 0.61      |       | 0.87         | 0.29          | 0.46         |
|  <p><a href="#">CHEMBL246928</a><br/>IC50:260nM</p>   |      |          | 0.52   |         |         |         |      |         |           |       |              |               |              |
|  <p><a href="#">CHEMBL2182053</a><br/>IC50:17.5µM</p> |      |          |        |         | 0.69    |         |      |         |           |       |              |               |              |
|  <p><a href="#">CHEMBL4176330</a><br/>IC50:180nM</p>  |      |          |        | 0.32    |         |         |      | 0.65    |           |       |              |               |              |
|  <p><a href="#">CHEMBL482498</a><br/>IC50:27.4µM</p>  |      |          |        |         |         | 0.26    |      |         |           |       |              |               |              |

| structure                                                                                                                             | mfp1 | featmfp1 | rdkit7 | pattern | ap_bits | tt_bits | fp2 | pubchem | cdk_maccs | graph | substructure | hybridization | klekota_roth |
|---------------------------------------------------------------------------------------------------------------------------------------|------|----------|--------|---------|---------|---------|-----|---------|-----------|-------|--------------|---------------|--------------|
| 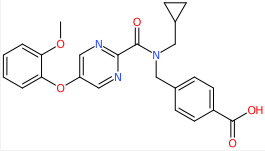 <p><a href="#">CHEMBL3897650</a><br/>IC50:170nM</p> |      |          |        |         |         |         |     |         |           | 0.47  |              |               |              |



tid: 10417

chembl id: [CHEMBL4805](#)

name: P2X purinoceptor 7:Homo sapiens

## similarity analysis

| structure                                                                                                                                | mfp1 | featmfp1 | rdkit7 | pattern | ap_bits | tt_bits | fp2  | pubchem | cdk_maccs | graph | substructure | hybridization | klekota_roth |
|------------------------------------------------------------------------------------------------------------------------------------------|------|----------|--------|---------|---------|---------|------|---------|-----------|-------|--------------|---------------|--------------|
| 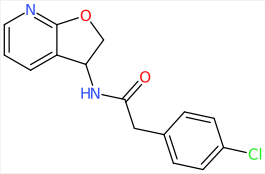 <p><a href="#">CHEMBL3946649</a><br/>IC50:1.41μM</p>   |      |          |        |         |         |         | 0.44 |         |           |       |              |               |              |
|  <p><a href="#">CHEMBL131241</a><br/>IC50:63.1nM</p>   |      |          |        |         |         |         | 0.33 |         |           |       |              |               |              |
|  <p><a href="#">CHEMBL3969023</a><br/>IC50:15.0nM</p> |      |          |        |         |         |         | 0.54 |         |           |       |              |               |              |
|  <p><a href="#">CHEMBL2048264</a><br/>IC50:1.50μM</p> |      |          |        |         |         |         | 0.71 |         |           |       |              |               |              |
|  <p><a href="#">CHEMBL4165149</a><br/>IC50:0.30nM</p> |      |          |        |         |         |         | 0.31 |         |           |       |              |               |              |

| structure                                                                                                                 | mfp1 | featmfp1 | rdkit7 | pattern | ap_bits | tt_bits | fp2  | pubchem | cdk_maccs | graph | substructure | hybridization | klekota_roth |
|---------------------------------------------------------------------------------------------------------------------------|------|----------|--------|---------|---------|---------|------|---------|-----------|-------|--------------|---------------|--------------|
| 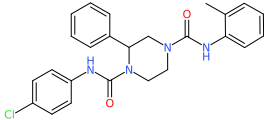<br><b>CHEMBL21149</b><br>IC50:780nM     |      |          |        |         |         |         | 0.23 |         |           |       |              |               |              |
| <br><b>CHEMBL3741412</b><br>IC50:9.00nM  |      |          |        |         |         |         |      |         |           |       | 0.51         |               |              |
| <br><b>CHEMBL560167</b><br>IC50:79.4nM   |      |          |        |         |         |         |      |         |           |       |              | 0.33          |              |
| <br><b>CHEMBL403105</b><br>IC50:1.86μM  |      |          |        |         |         |         |      | 0.73    |           |       |              |               |              |
| <br><b>CHEMBL271030</b><br>IC50:30.9nM |      |          |        |         |         |         |      |         |           |       | 0.86         |               |              |
| <br><b>CHEMBL2048274</b><br>IC50:370nM |      |          |        |         |         |         | 0.41 |         |           |       |              |               |              |
| <br><b>CHEMBL255614</b><br>IC50:30.9nM |      |          |        |         |         |         |      | 0.67    |           |       |              |               |              |

| structure                                                                                                             | mfp1 | featmfp1 | rdkit7 | pattern | ap_bits | tt_bits | fp2 | pubchem | cdk_maccs | graph | substructure | hybridization | klekota_roth |
|-----------------------------------------------------------------------------------------------------------------------|------|----------|--------|---------|---------|---------|-----|---------|-----------|-------|--------------|---------------|--------------|
| 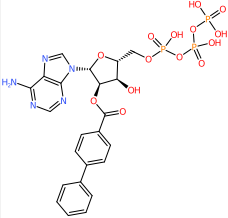 <p>CHEMBL339386<br/>EC50:52.0μM</p> |      |          |        |         |         |         |     |         |           |       |              |               | 0.37         |

tid: 10540  
 · chembl id: [CHEMBL2496](#)  
 name: P2X purinoceptor 7:Rattus norvegicus

## similarity analysis

| structure                                                                                                                           | mfp1 | featmfp1 | rdkit7 | pattern | ap_bits | tt_bits | fp2  | pubchem | cdk_maccs | graph | substructure | hybridization | klekota_roth |
|-------------------------------------------------------------------------------------------------------------------------------------|------|----------|--------|---------|---------|---------|------|---------|-----------|-------|--------------|---------------|--------------|
| 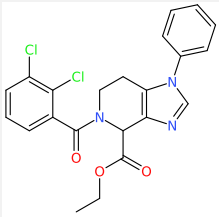<br><a href="#">CHEMBL3950348</a><br>IC50:1.89µM   |      |          |        |         | 0.43    |         |      |         |           | 0.47  |              |               |              |
| <br><a href="#">CHEMBL403105</a><br>IC50:11.0µM   |      |          |        |         |         |         | 0.30 | 0.73    |           |       |              |               |              |
| <br><a href="#">CHEMBL3604426</a><br>IC50:10.0nM |      |          |        |         | 0.45    |         |      |         |           |       |              |               |              |
| <br><a href="#">CHEMBL404091</a><br>IC50:1.12µM  |      |          |        |         | 0.68    |         |      |         |           |       |              |               |              |
| <br><a href="#">CHEMBL479578</a><br>IC50:5.19µM  |      |          |        |         | 0.29    |         |      |         |           |       |              |               |              |

| structure                                                                                                                 | mfp1 | featmfp1 | rdkit7 | pattern | ap_bits | tt_bits | fp2  | pubchem | cdk_maccs | graph | substructure | hybridization | klekota_roth |
|---------------------------------------------------------------------------------------------------------------------------|------|----------|--------|---------|---------|---------|------|---------|-----------|-------|--------------|---------------|--------------|
| 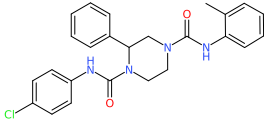<br><b>CHEMBL21149</b><br>IC50:620nM     |      |          |        |         |         |         | 0.23 |         |           |       |              |               |              |
| <br><b>CHEMBL393384</b><br>IC50:631nM    |      |          |        |         |         |         |      |         |           |       |              | 0.32          |              |
| <br><b>CHEMBL271030</b><br>IC50:135nM   |      |          |        |         |         |         |      |         |           |       | 0.86         |               |              |
| <br><b>CHEMBL255614</b><br>IC50:35.5nM |      |          |        |         |         |         | 0.37 |         | 0.67      |       |              |               |              |
| <br><b>CHEMBL481481</b><br>IC50:2.04μM |      |          |        |         |         |         |      |         |           |       |              |               | 0.28         |

tid: 102439

chembl id: [CHEMBL6136](#)

name: Lysine-specific histone demethylase 1:Homo sapiens

## similarity analysis

| structure                                                                                                                           | mfp1 | featmfp1 | rdkit7 | pattern | ap_bits | tt_bits | fp2  | pubchem | cdk_maccs | graph | substructure | hybridization | klekota_roth |
|-------------------------------------------------------------------------------------------------------------------------------------|------|----------|--------|---------|---------|---------|------|---------|-----------|-------|--------------|---------------|--------------|
| 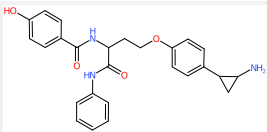<br><a href="#">CHEMBL3104339</a><br>IC50:1.90μM   |      |          |        |         |         |         | 0.43 |         |           |       |              |               |              |
| <br><a href="#">CHEMBL1795981</a><br>Ki:1.56μM     |      |          |        |         | 0.74    |         | 0.34 |         |           |       |              |               | 0.38         |
| <br><a href="#">CHEMBL3134368</a><br>IC50:29.5μM |      |          |        |         |         |         |      |         | 0.54      |       |              |               |              |
| <br><a href="#">CHEMBL1581095</a><br>IC50:25.7μM |      |          |        |         | 0.28    |         |      |         |           |       |              |               |              |
| <br><a href="#">CHEMBL2426048</a><br>IC50:38.7μM |      |          |        |         |         |         | 0.32 |         |           |       |              |               |              |
| <br><a href="#">CHEMBL1797639</a><br>IC50:2.42μM |      |          |        |         |         |         |      |         |           | 0.43  |              |               |              |

| structure                                                                                                                 | mfp1 | featmfp1 | rdkit7 | pattern | ap_bits | tt_bits | fp2 | pubchem | cdk_maccs | graph | substructure | hybridization | klekota_roth |
|---------------------------------------------------------------------------------------------------------------------------|------|----------|--------|---------|---------|---------|-----|---------|-----------|-------|--------------|---------------|--------------|
| 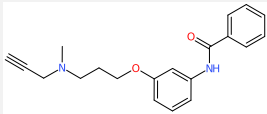<br><b>CHEMBL2426047</b><br>IC50:93.1µM  |      |          |        |         |         |         |     |         |           |       |              |               | 0.36         |
| <br><b>CHEMBL3786908</b><br>IC50:90.0µM  |      |          |        |         |         |         |     | 0.66    |           |       |              |               |              |
| <br><b>CHEMBL2334486</b><br>IC50:53.2µM  |      |          |        |         |         |         |     |         |           |       |              | 0.86          |              |
| <br><b>CHEMBL3651589</b><br>Ki:47.0nM   |      |          |        |         |         |         |     |         |           |       |              | 0.34          |              |
| <br><b>CHEMBL4066743</b><br>IC50:155nM |      |          |        |         |         |         |     |         |           |       |              |               | 0.63         |
